# Supplementary material for: Assimilation of radar freeboard and snow altimetry observations in the Arctic and Antarctic with a coupled ocean/sea ice modelling system
Source: Copernicus journal article supplement (doi:10.5194/egusphere-2024-3633), 2024-12-20

# Figures for RC1

## Monthly Sea ice concentration

The following figures, similar to Figure 2 in the manuscript, display monthly means of sea ice concentration (%) from January 2017 to January 2019 for Arctic and Antarctic. SSMIS observations are shown in the first column. Differences between the experiments (FREE, UNIVAR, MULTIVAR) and SSMIS are shown from the second to the fourth column. Root means squared errors (RMS) are provided under each plot.

(a) January 2017 Arctic SIC differences relative to OSISAF SSMIS

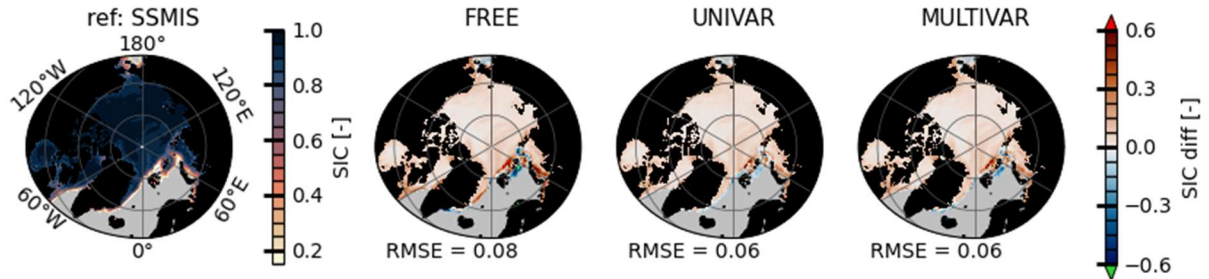

(b) January 2017 Antarctic SIC differences relative to OSISAF SSMIS

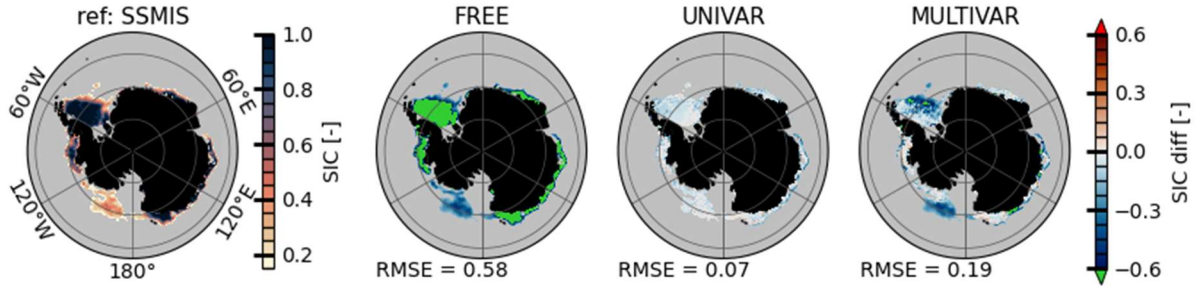

(a) February 2017 Arctic SIC differences relative to OSISAF SSMIS

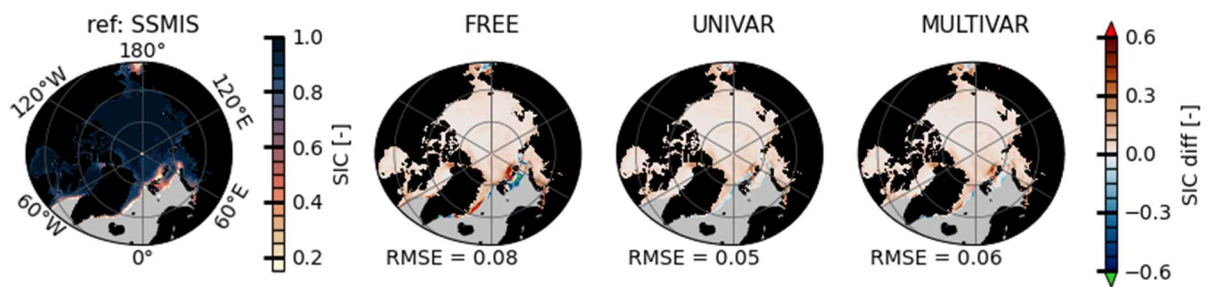

(b) February 2017 Antarctic SIC differences relative to OSISAF SSMIS

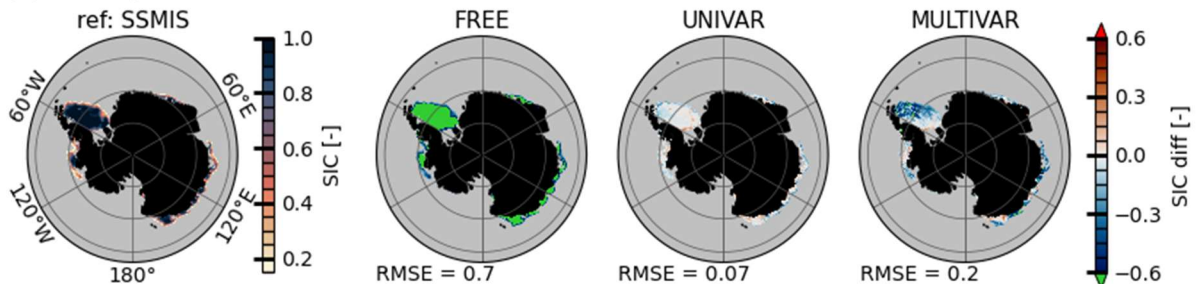

(a) March 2017 Arctic SIC differences relative to OSISAF SSMIS

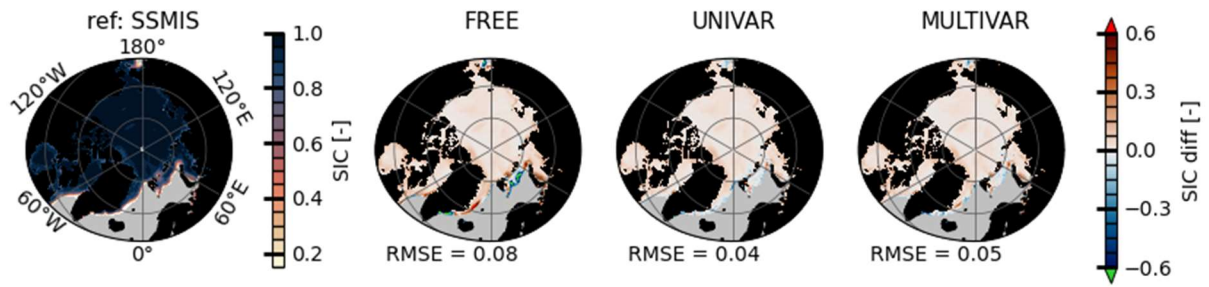

(b) March 2017 Antarctic SIC differences relative to OSISAF SSMIS

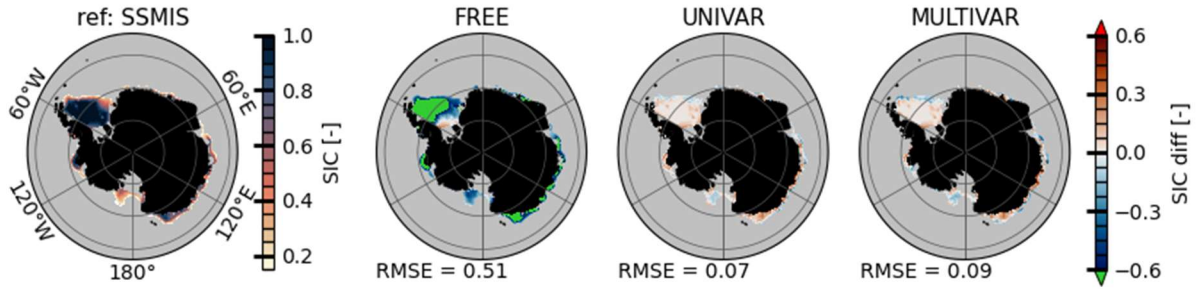

(a) April 2017 Arctic SIC differences relative to OSISAF SSMIS

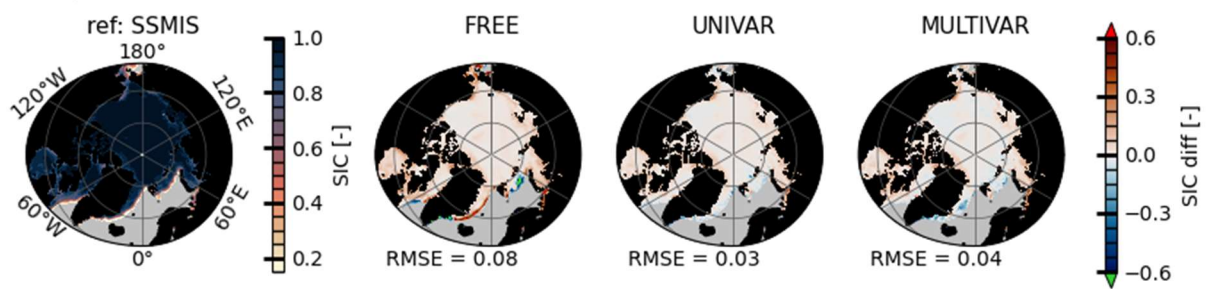

(b) April 2017 Antarctic SIC differences relative to OSISAF SSMIS

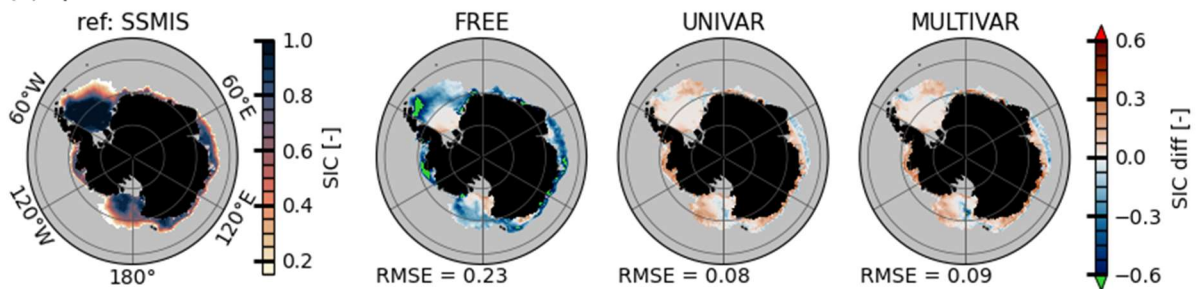

(a) Mai 2017 Arctic SIC differences relative to OSISAF SSMIS

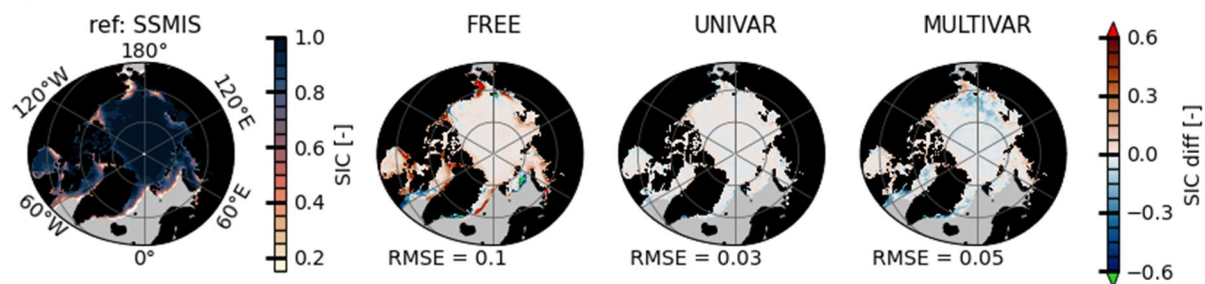

(b) Mai 2017 Antarctic SIC differences relative to OSISAF SSMIS

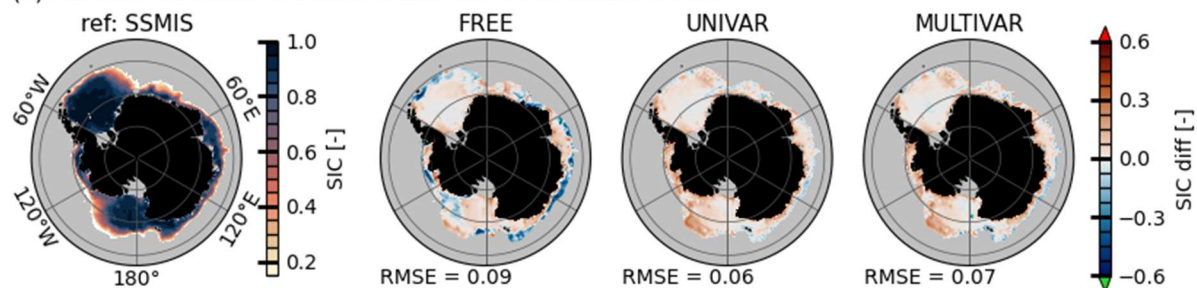

(a) June 2017 Arctic SIC differences relative to OSISAF SSMIS

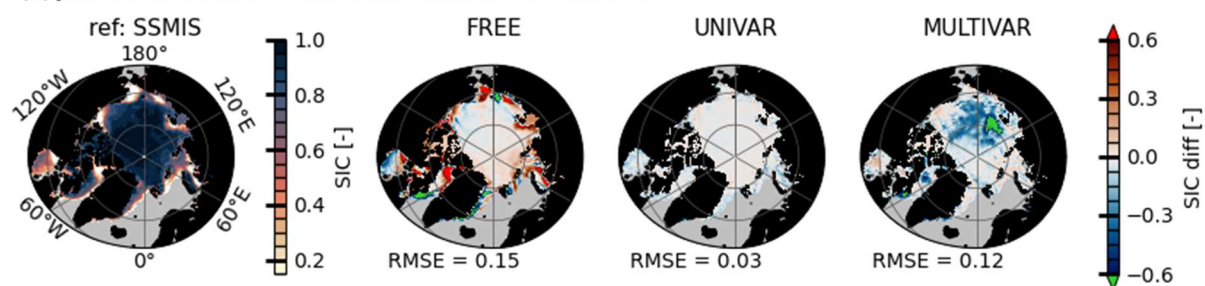

(b) June 2017 Antarctic SIC differences relative to OSISAF SSMIS

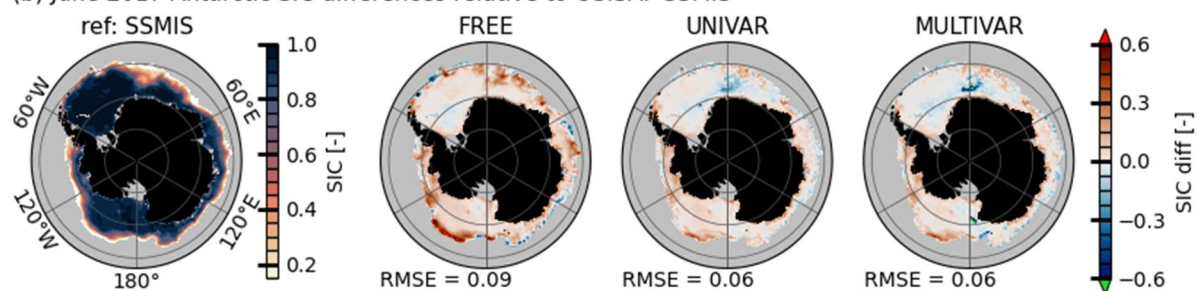



(a) July 2017 Arctic SIC differences relative to OSISAF SSMIS

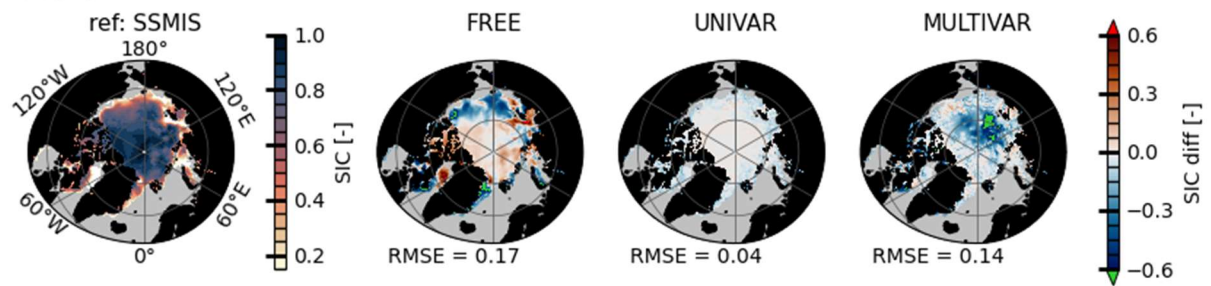

(b) July 2017 Antarctic SIC differences relative to OSISAF SSMIS

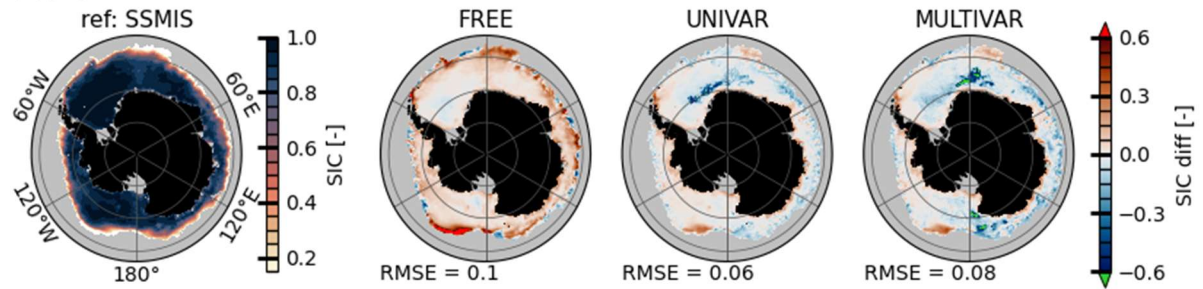

(a) August 2017 Arctic SIC differences relative to OSISAF SSMIS

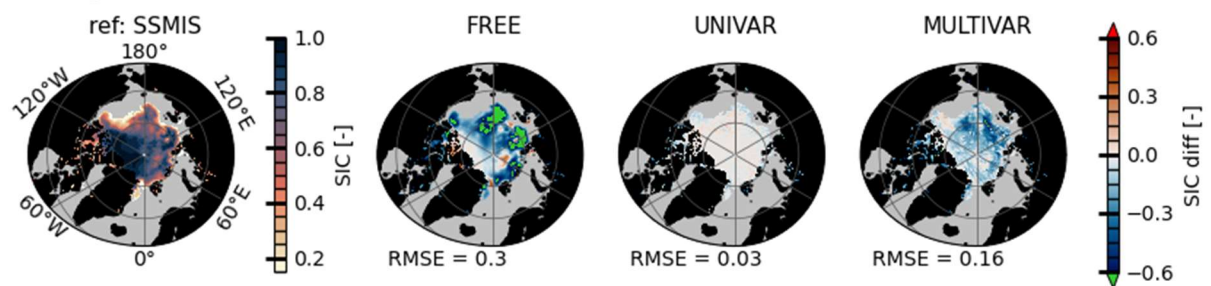

(b) August 2017 Antarctic SIC differences relative to OSISAF SSMIS

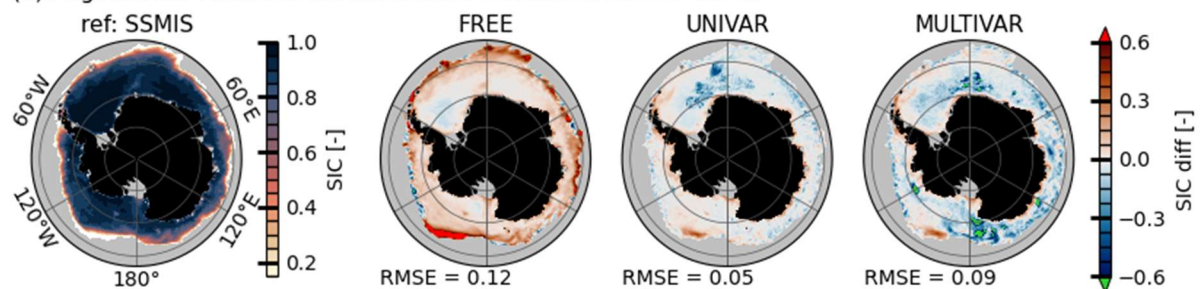



(a) September 2017 Arctic SIC differences relative to OSISAF SSMIS

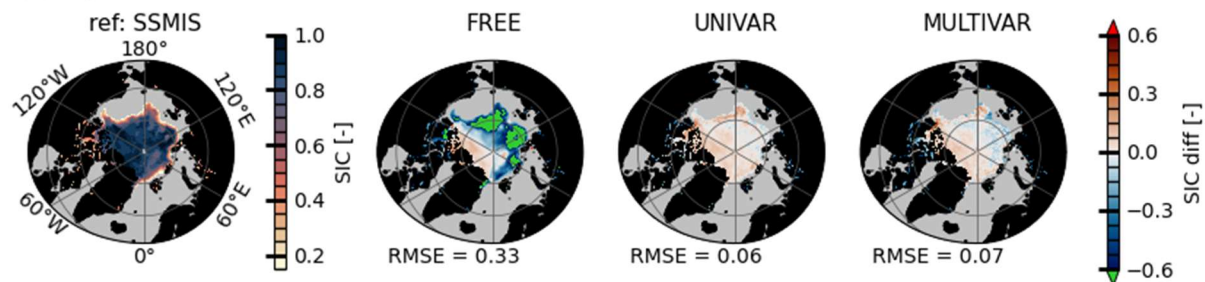

(b) September 2017 Antarctic SIC differences relative to OSISAF SSMIS

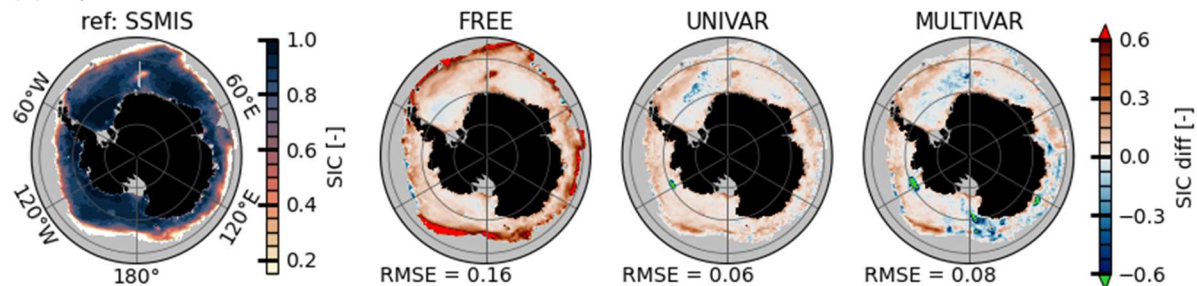

(a) October 2017 Arctic SIC differences relative to OSISAF SSMIS

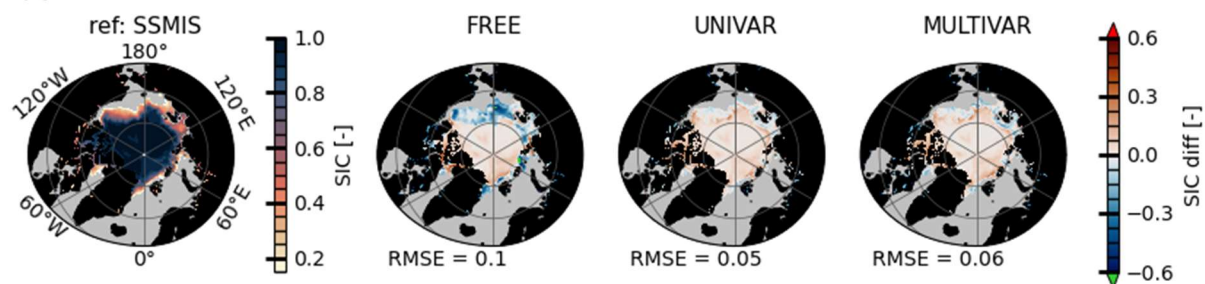

(b) October 2017 Antarctic SIC differences relative to OSISAF SSMIS

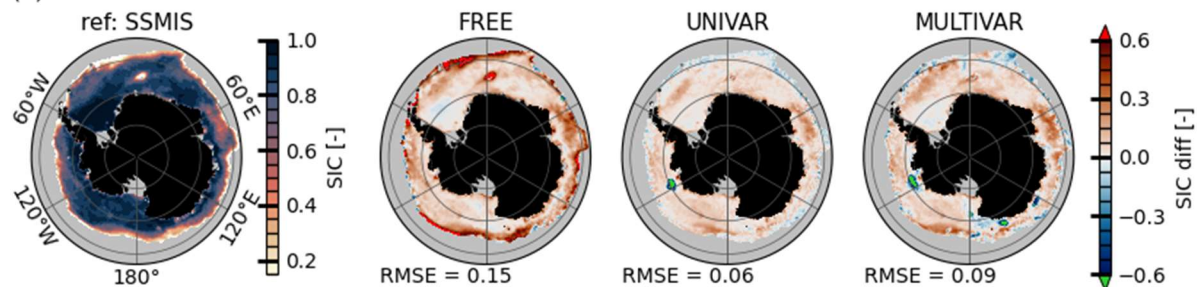

(a) November 2017 Arctic SIC differences relative to OSISAF SSMIS

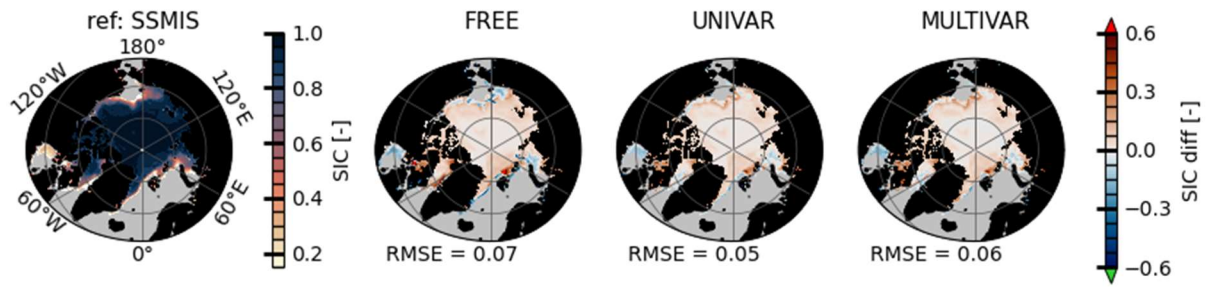

(b) November 2017 Antarctic SIC differences relative to OSISAF SSMIS

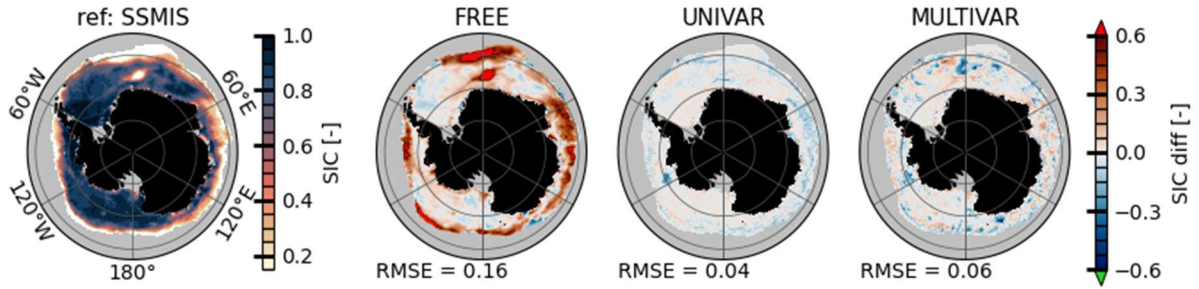

(a) December 2017 Arctic SIC differences relative to OSISAF SSMIS

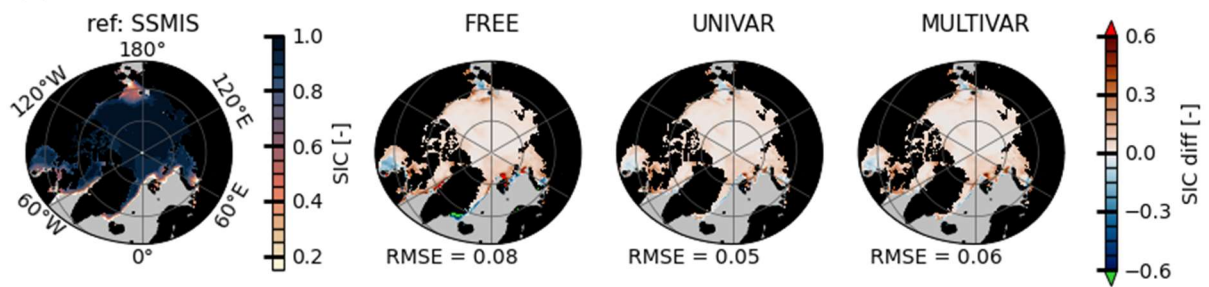

(b) December 2017 Antarctic SIC differences relative to OSISAF SSMIS

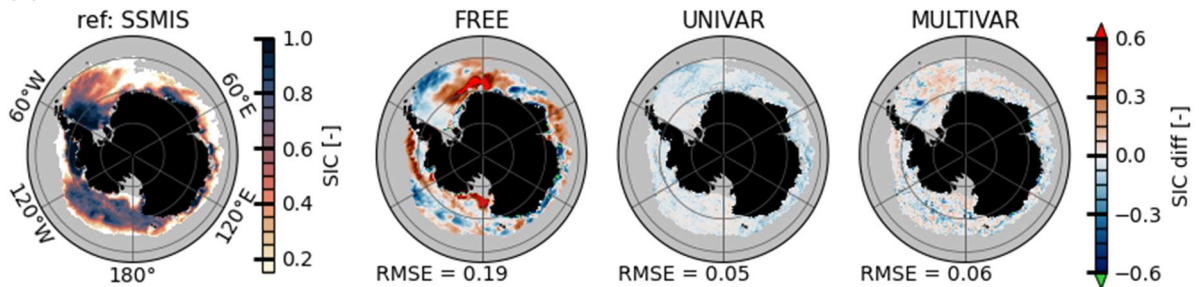

(a) January 2018 Arctic SIC differences relative to OSISAF SSMIS

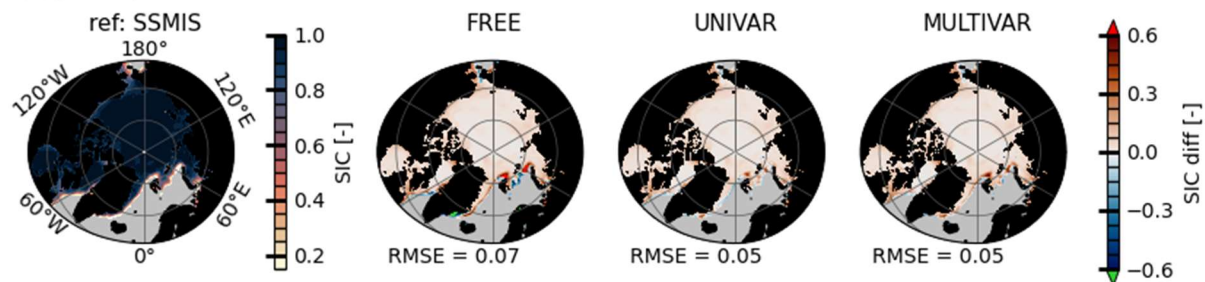

(b) January 2018 Antarctic SIC differences relative to OSISAF SSMIS

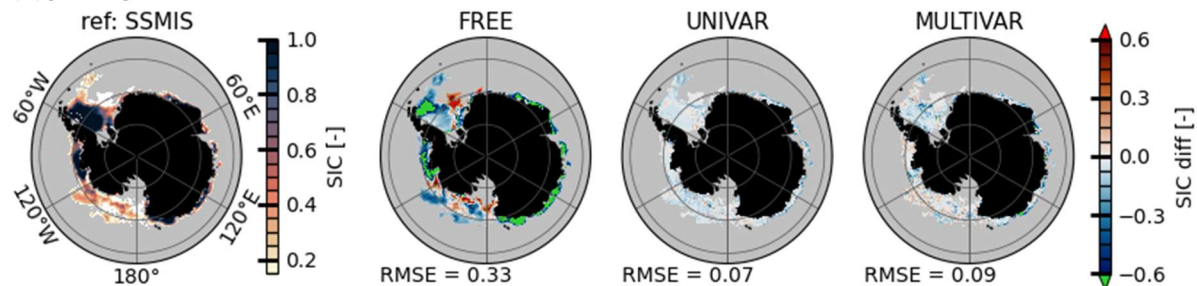

(a) February 2018 Arctic SIC differences relative to OSISAF SSMIS

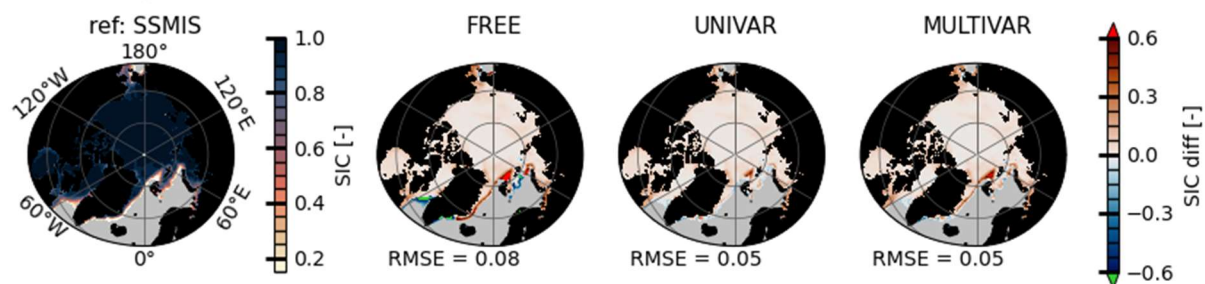

(b) February 2018 Antarctic SIC differences relative to OSISAF SSMIS

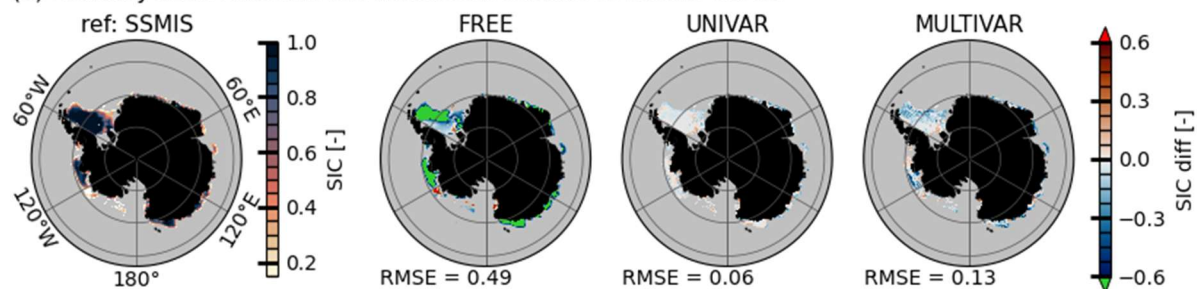



(a) March 2018 Arctic SIC differences relative to OSISAF SSMIS

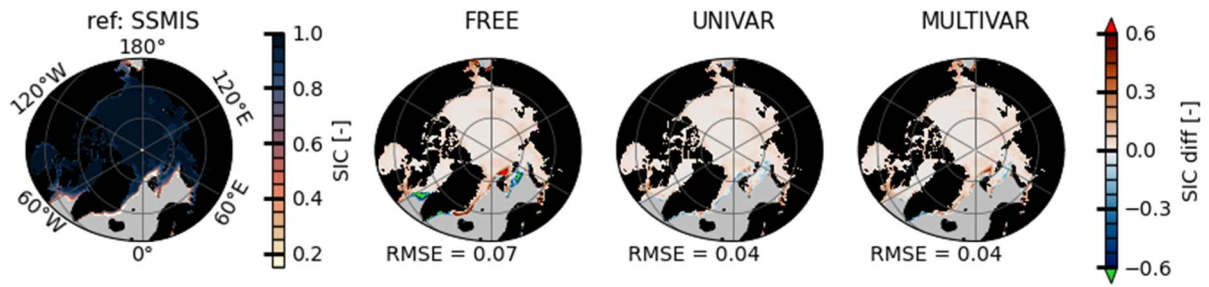

(b) March 2018 Antarctic SIC differences relative to OSISAF SSMIS

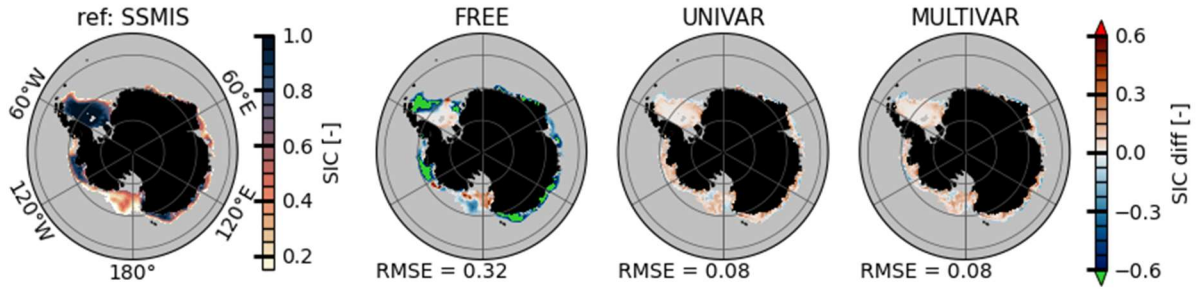

(a) April 2018 Arctic SIC differences relative to OSISAF SSMIS

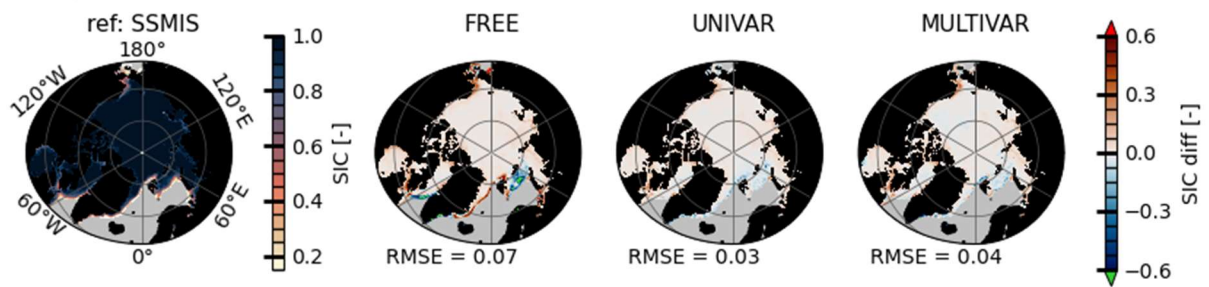

(b) April 2018 Antarctic SIC differences relative to OSISAF SSMIS

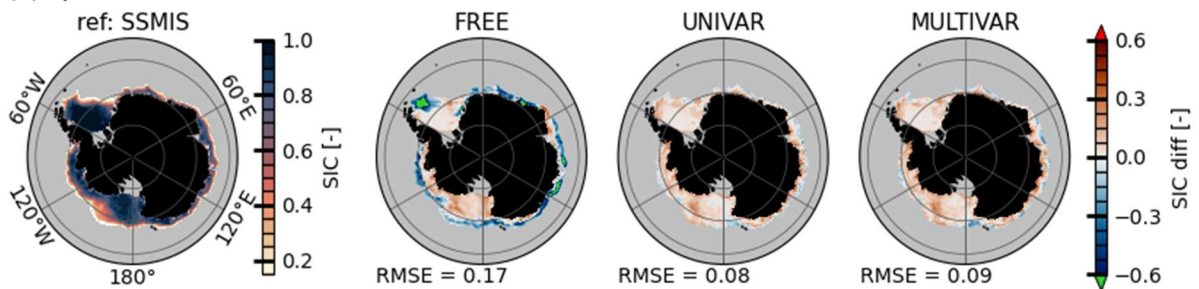

(a) May 2018 Arctic SIC differences relative to OSISAF SSMIS

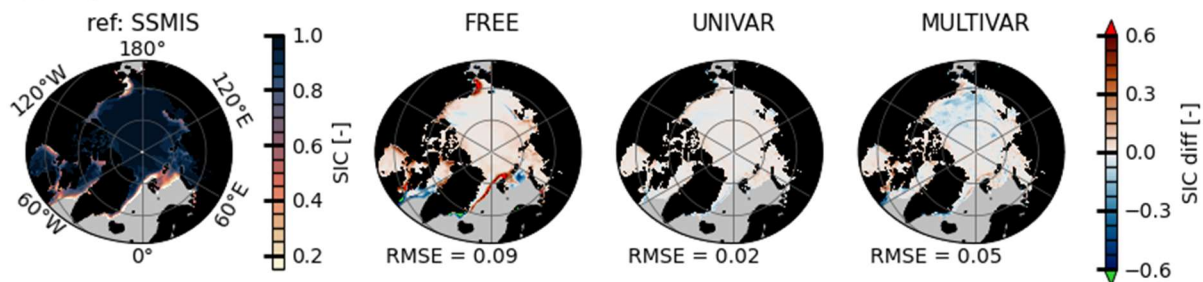

(b) May 2018 Antarctic SIC differences relative to OSISAF SSMIS

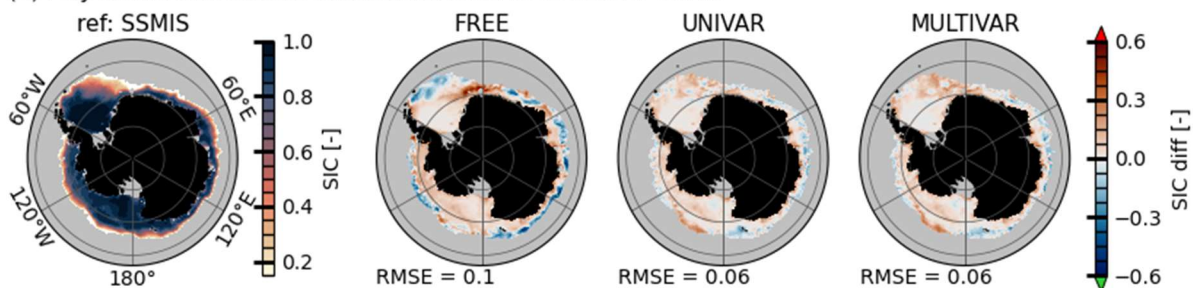

(a) June 2018 Arctic SIC differences relative to OSISAF SSMIS

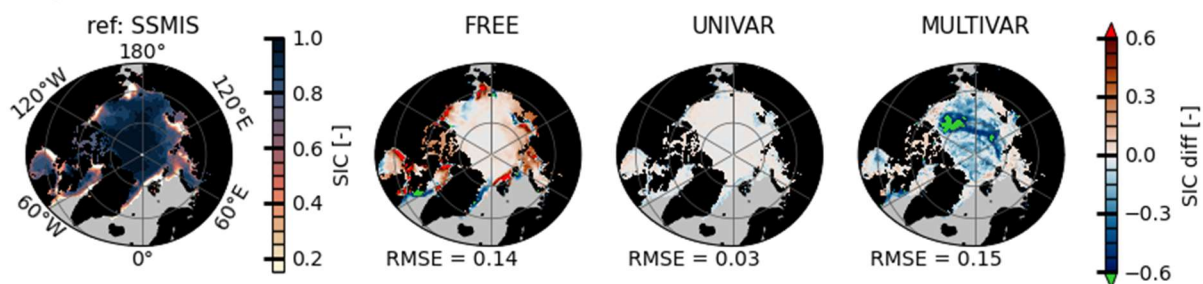

(b) June 2018 Antarctic SIC differences relative to OSISAF SSMIS

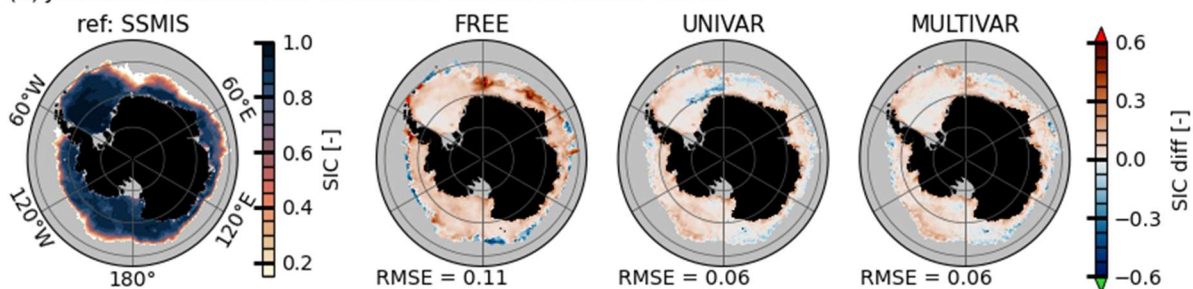

(a) July 2018 Arctic SIC differences relative to OSISAF SSMIS

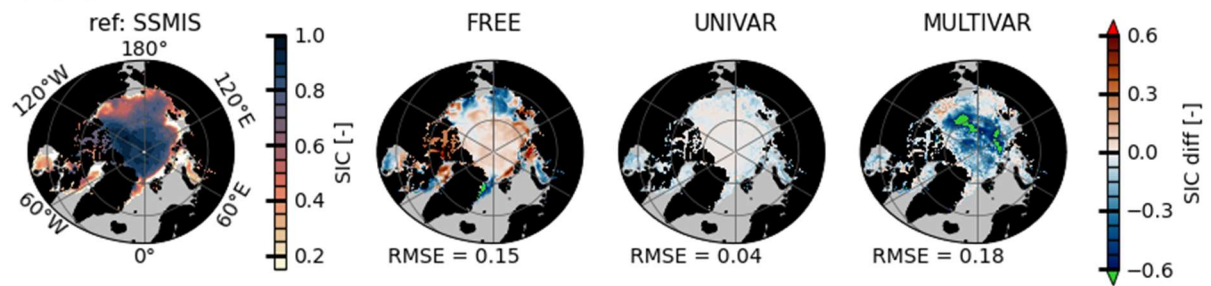

(b) July 2018 Antarctic SIC differences relative to OSISAF SSMIS

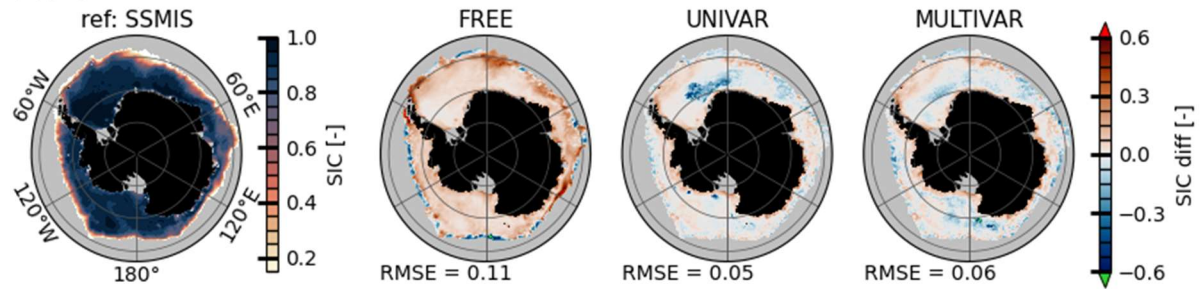

(a) August 2018 Arctic SIC differences relative to OSISAF SSMIS

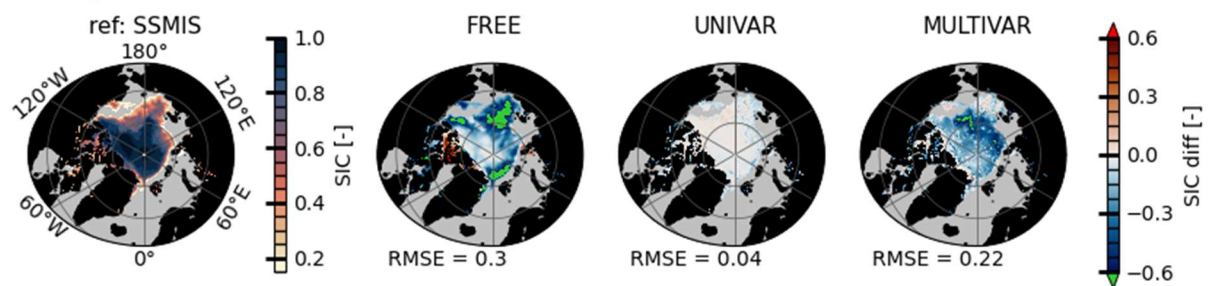

(b) August 2018 Antarctic SIC differences relative to OSISAF SSMIS

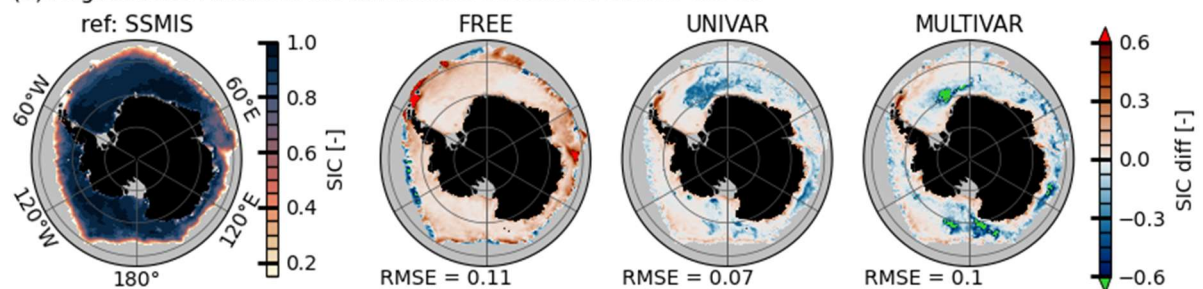



(a) September 2018 Arctic SIC differences relative to OSISAF SSMIS

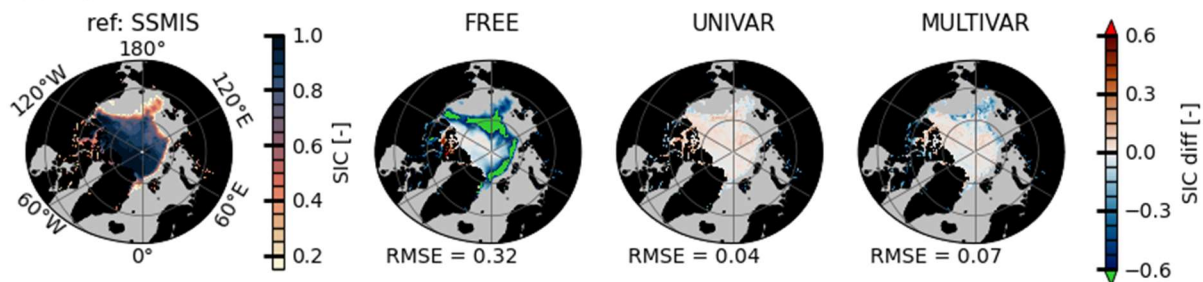

(b) September 2018 Antarctic SIC differences relative to OSISAF SSMIS

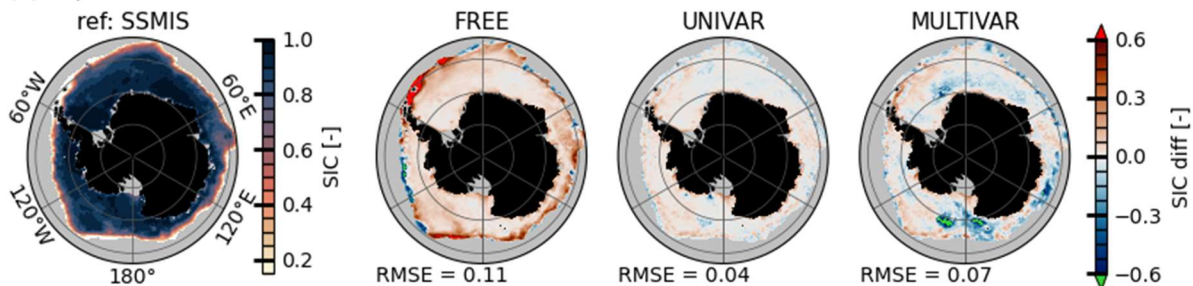

(a) October 2018 Arctic SIC differences relative to OSISAF SSMIS

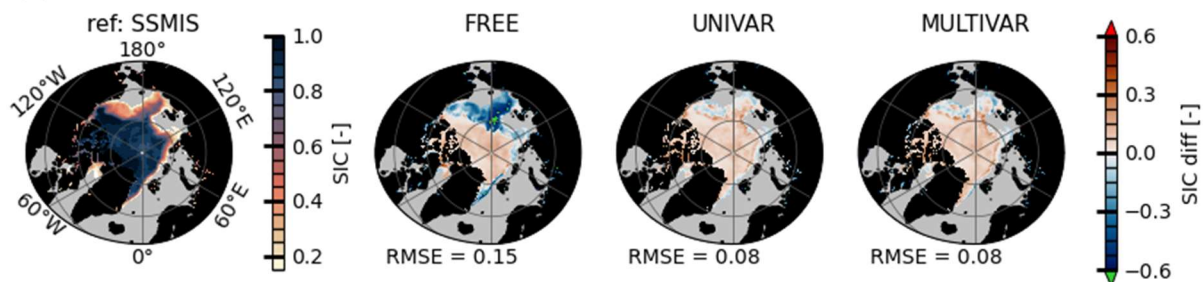

(b) October 2018 Antarctic SIC differences relative to OSISAF SSMIS

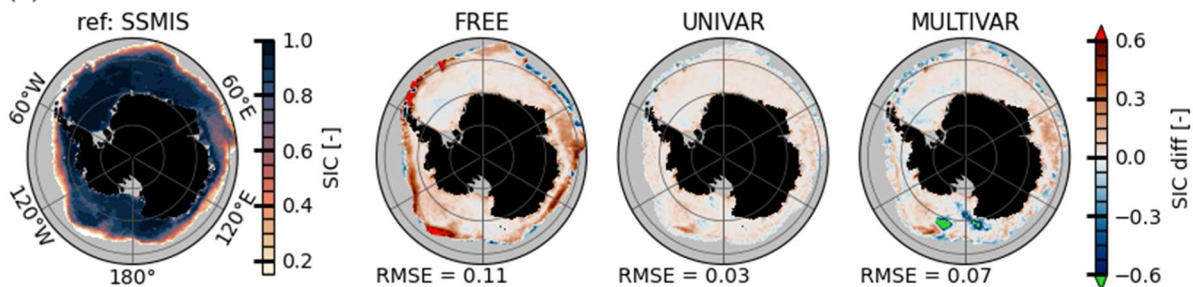

(a) November 2018 Arctic SIC differences relative to OSISAF SSMIS

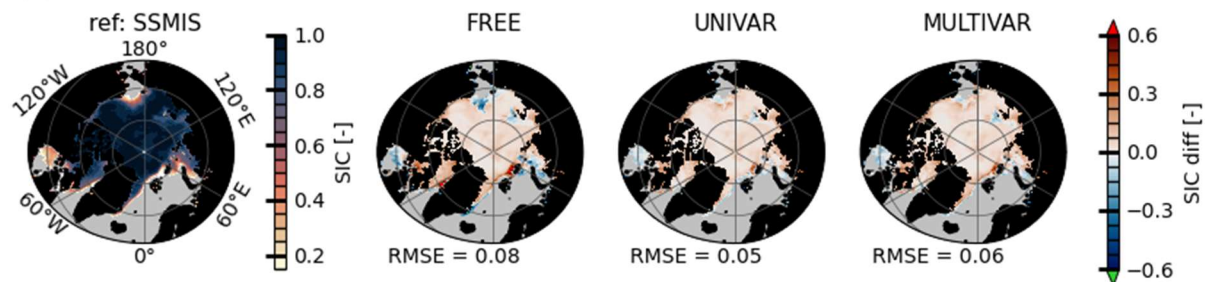

(b) November 2018 Antarctic SIC differences relative to OSISAF SSMIS

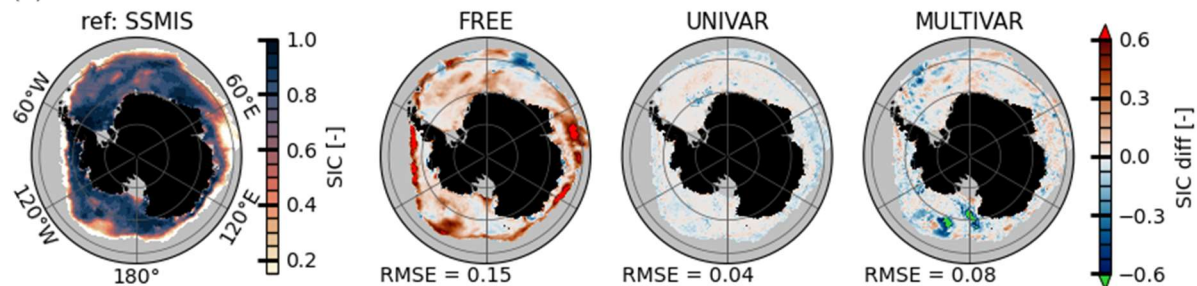

(a) December 2018 Arctic SIC differences relative to OSISAF SSMIS

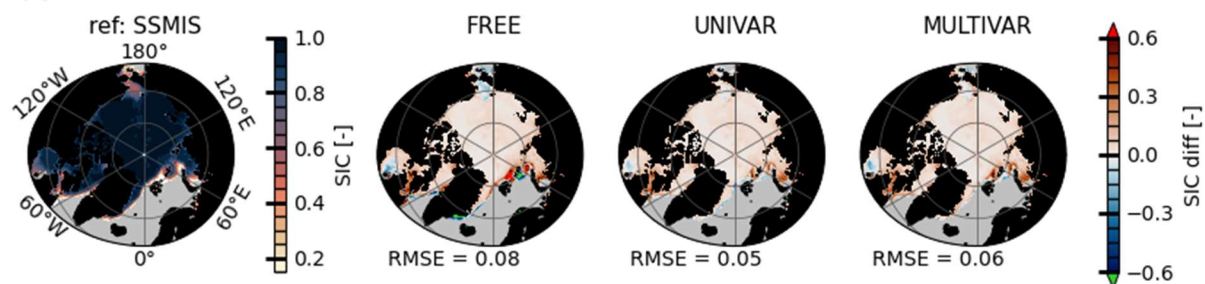

(b) December 2018 Antarctic SIC differences relative to OSISAF SSMIS

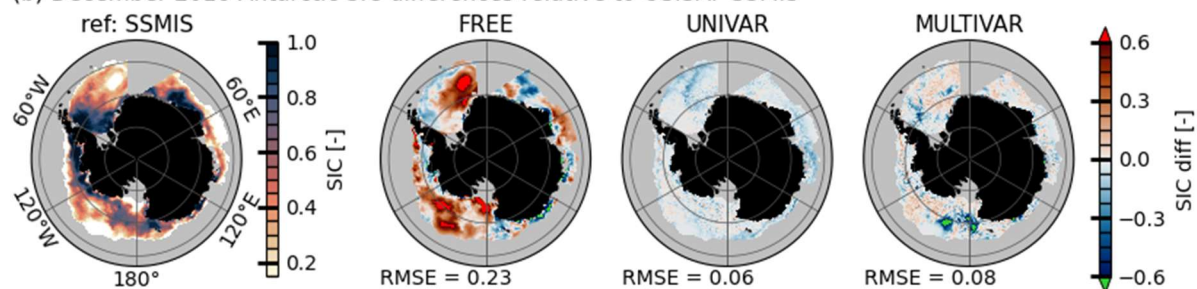

(a) January 2019 Arctic SIC differences relative to OSISAF SSMIS

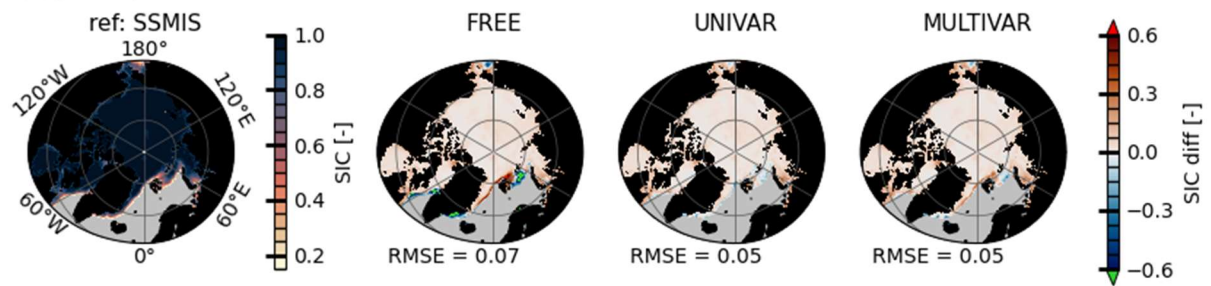

(b) January 2019 Antarctic SIC differences relative to OSISAF SSMIS

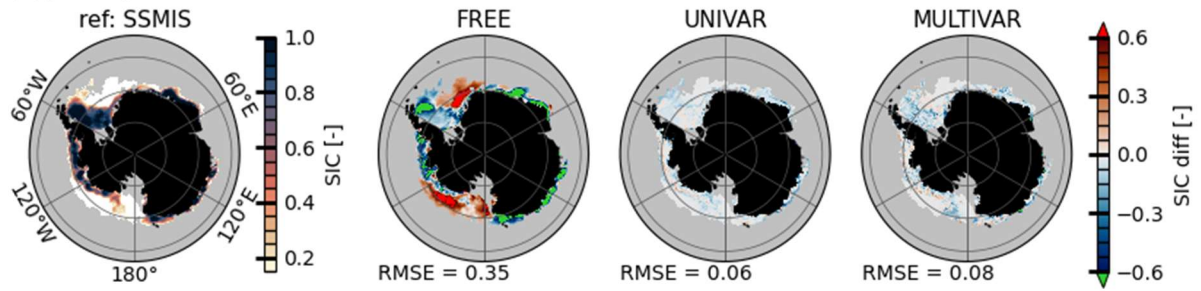



### **Radar Freeboard, snow thickness and probability density functions in the Arctic.**

The following figures, similar to Figure 3 in the manuscript, display radar freeboard, snow thickness and probability functions in the Arctic for the periods January 2017-April 2017, November 2017-April 2108 and November 2018-January 2019. Top panels (a): Probability density functions (%) of the snow thickness, the radar freeboard SAR and radar freeboard SARin observations (dotted black) and their model equivalent for the FREE (blue), UNIVAR (green) and MULTIVAR (pink) experiments in the Arctic. Middle (b), resp. bottom (c), row panels: snow volume per unit area [ $\text{m}^3/\text{m}^2$ ], resp. radar freeboard volume per unit area, from SNOW-KaKu, resp. RFB LEGOS, (first column) and differences with FREE, UNIVAR and MULTIVAR experiments. Total snow and RFB volumes values and root mean squared difference (RMS) are provided under each map.

(a) January 2017 Arctic distributions

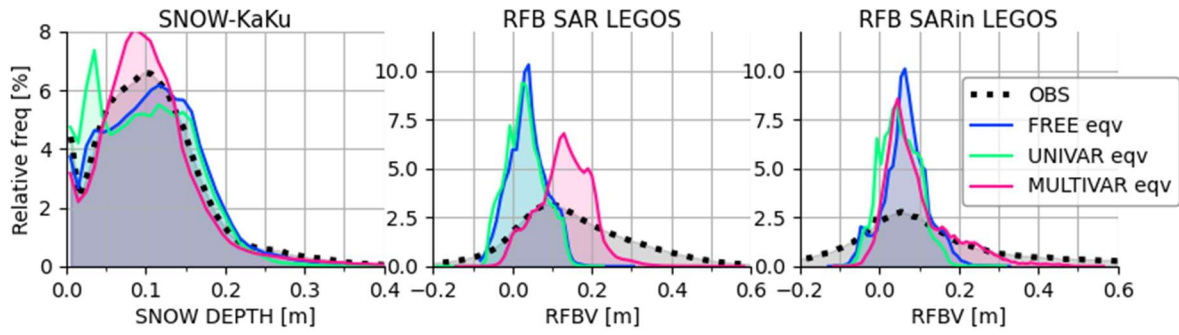

January 2017 Arctic snow volume differences relative to SNOW-KaKu

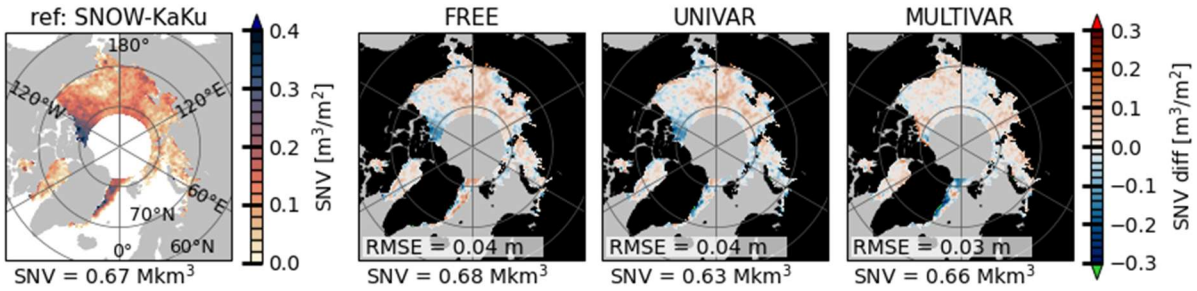

January 2017 Arctic radar freeboard volume differences relative to RFB LEGOS

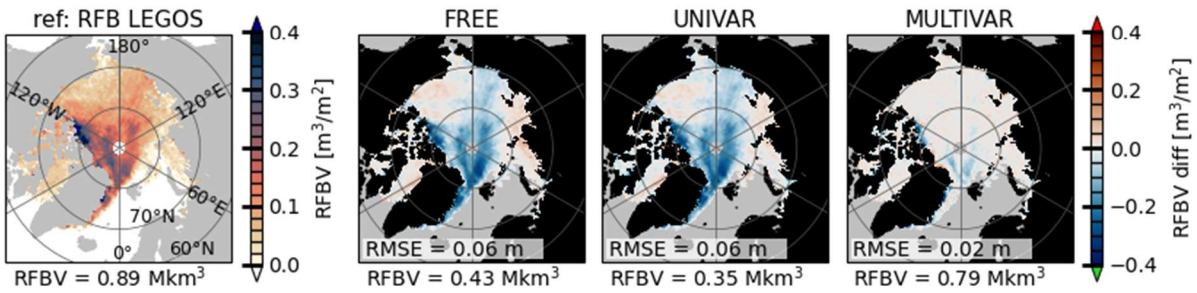

(a) February 2017 Arctic distributions

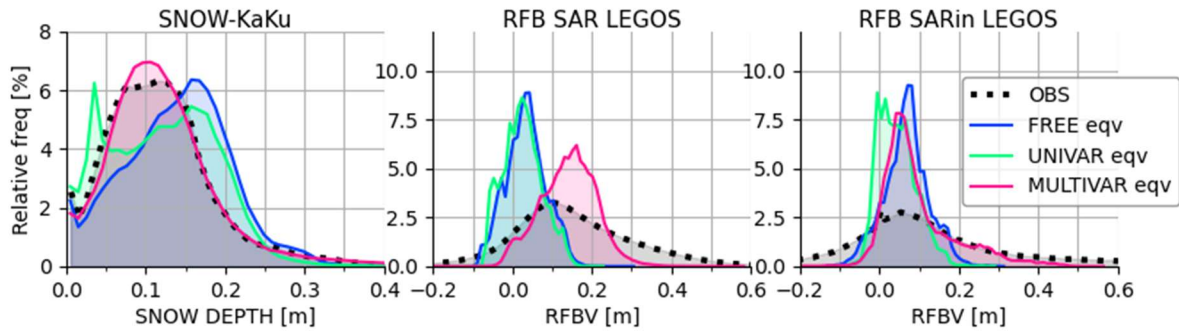

February 2017 Arctic snow volume differences relative to SNOW-KaKu

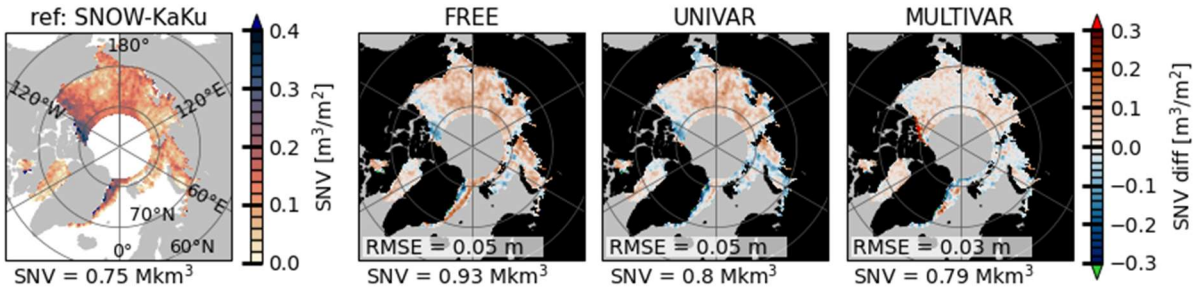

February 2017 Arctic radar freeboard volume differences relative to RFB LEGOS

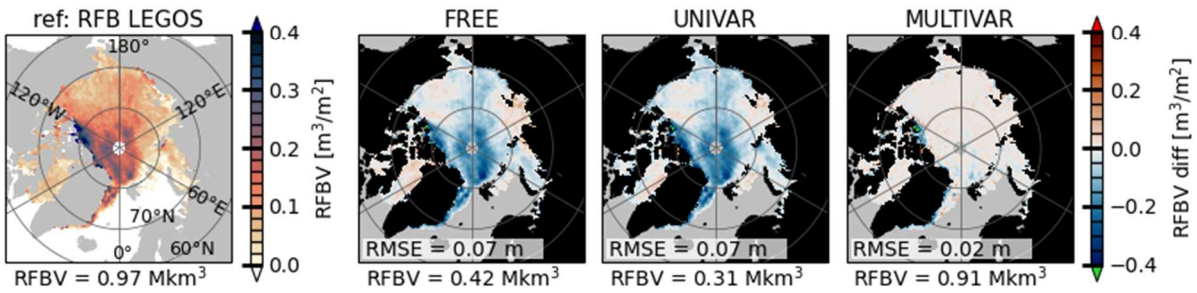



(a) March 2017 Arctic distributions

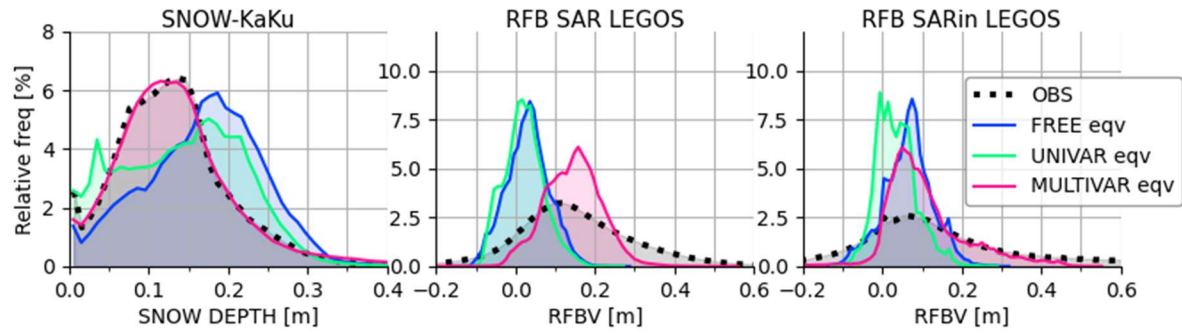

March 2017 Arctic snow volume differences relative to SNOW-KaKu

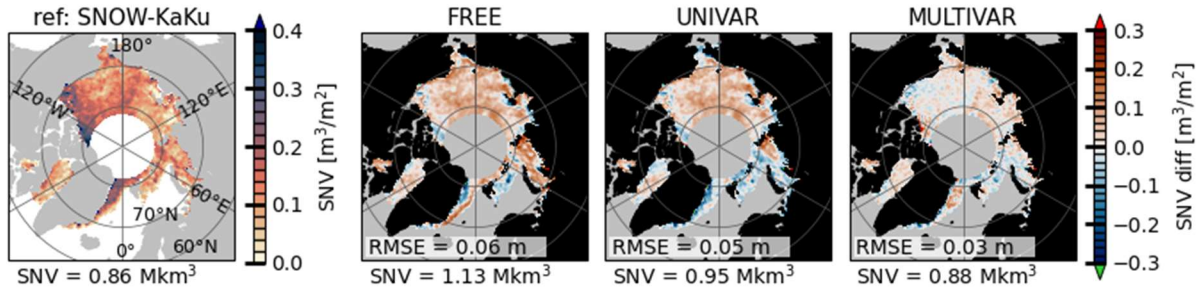

March 2017 Arctic radar freeboard volume differences relative to RFB LEGOS

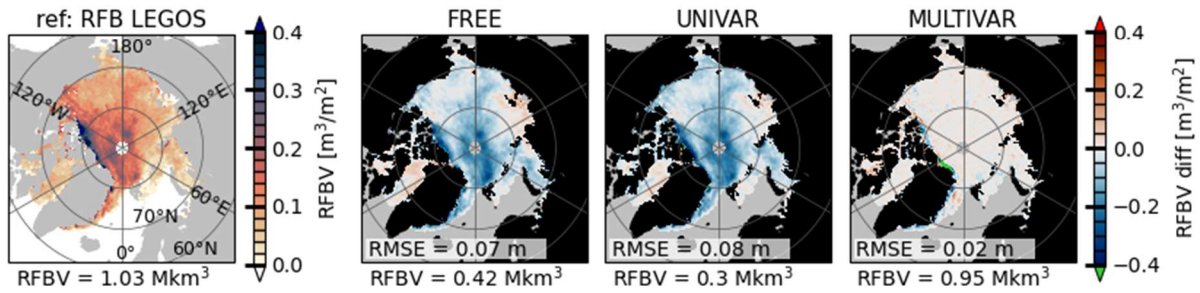

(a) April 2017 Arctic distributions

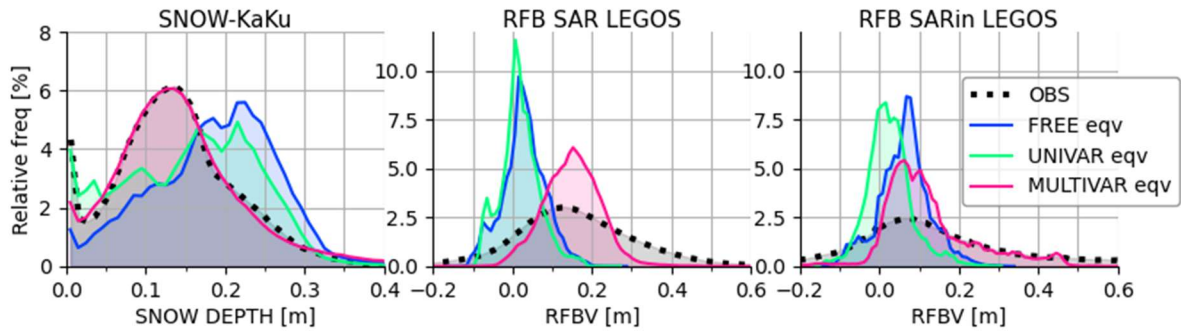

April 2017 Arctic snow volume differences relative to SNOW-KaKu

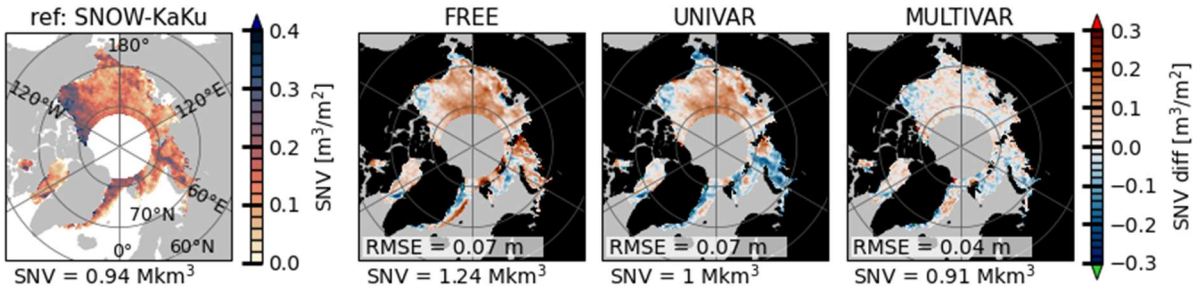

April 2017 Arctic radar freeboard volume differences relative to RFB LEGOS

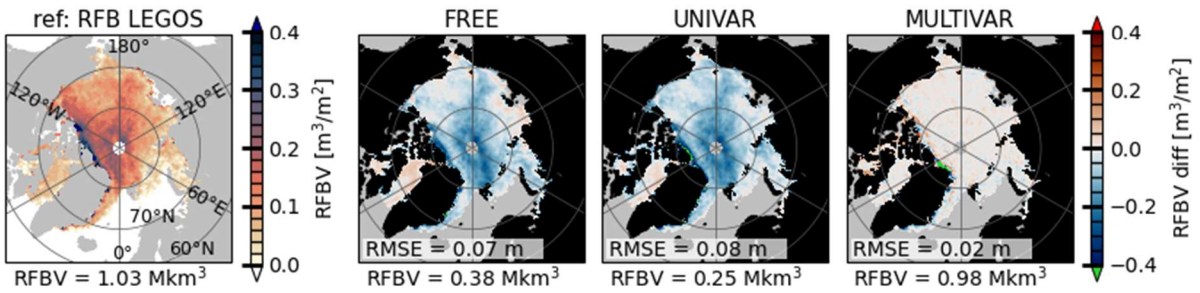

(a) November 2017 Arctic distributions

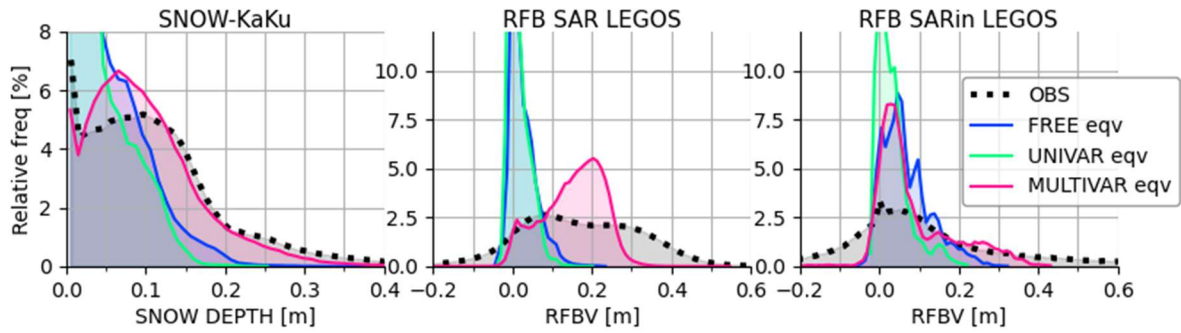

November 2017 Arctic snow volume differences relative to SNOW-KaKu

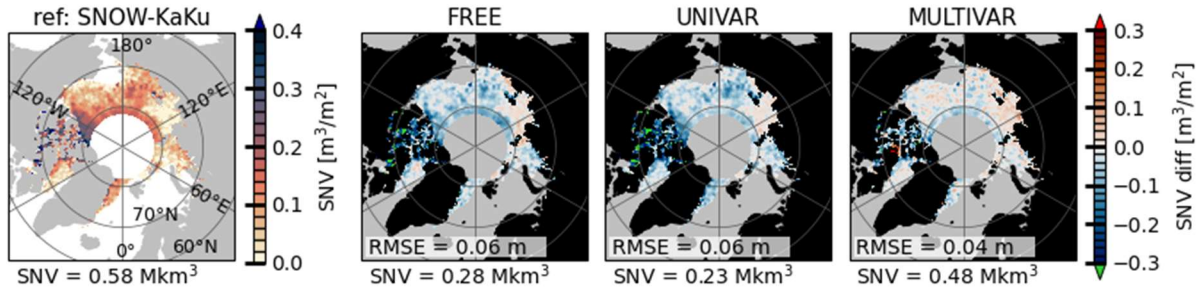

November 2017 Arctic radar freeboard volume differences relative to RFB LEGOS

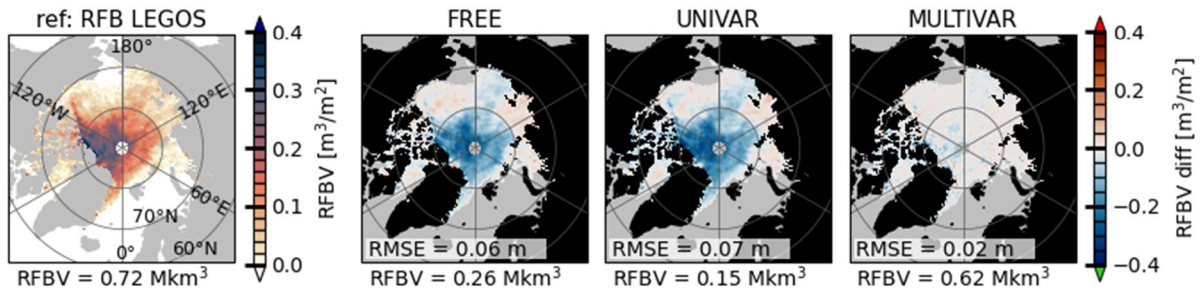



(a) December 2017 Arctic distributions

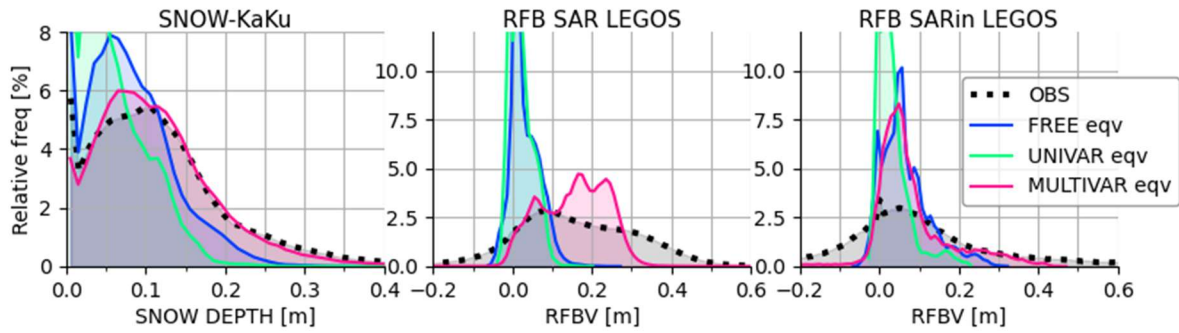

December 2017 Arctic snow volume differences relative to SNOW-KaKu

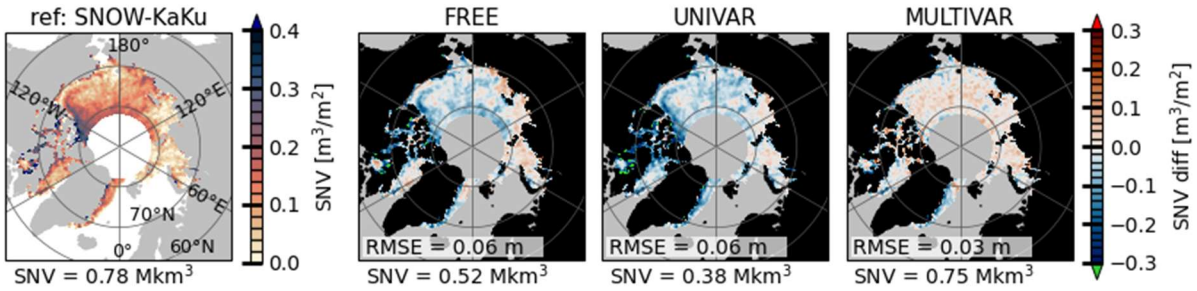

December 2017 Arctic radar freeboard volume differences relative to RFB LEGOS

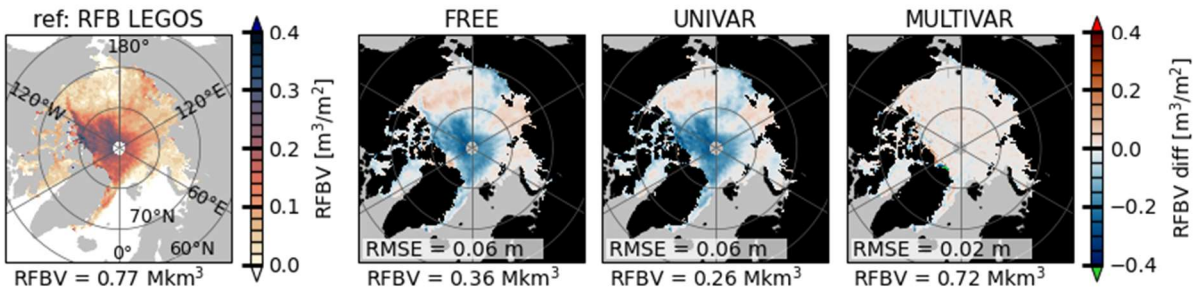

(a) January 2018 Arctic distributions

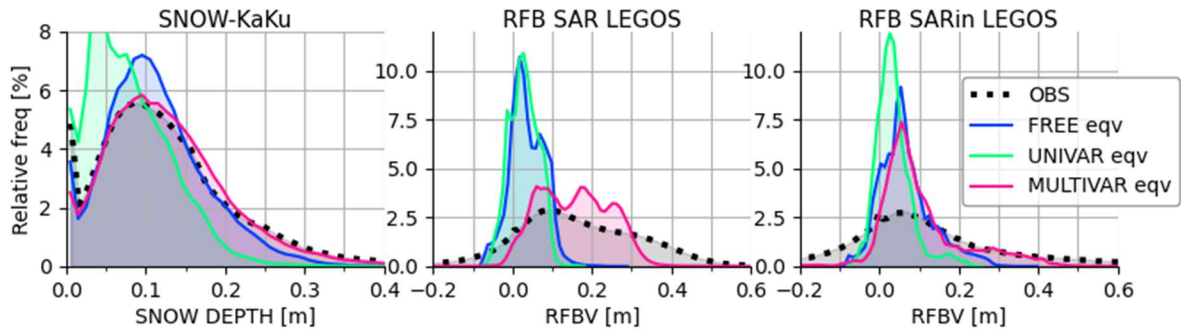

January 2018 Arctic snow volume differences relative to SNOW-KaKu

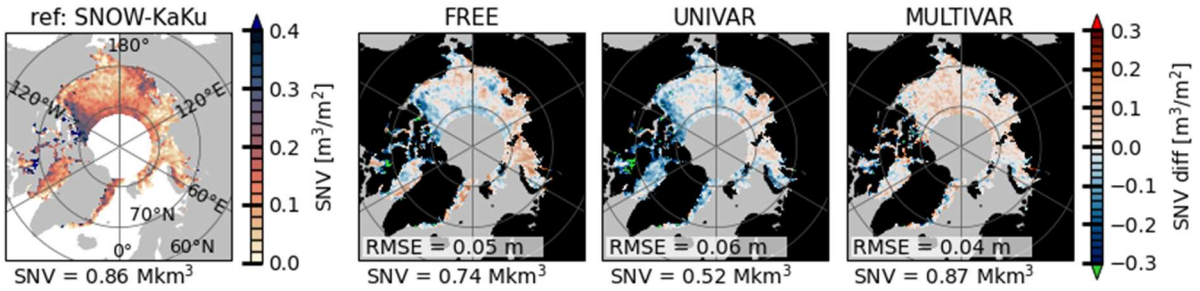

January 2018 Arctic radar freeboard volume differences relative to RFB LEGOS

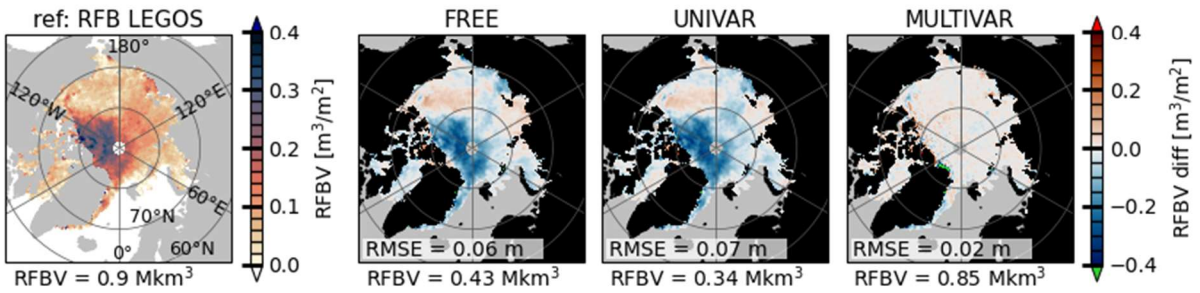

(a) February 2018 Arctic distributions

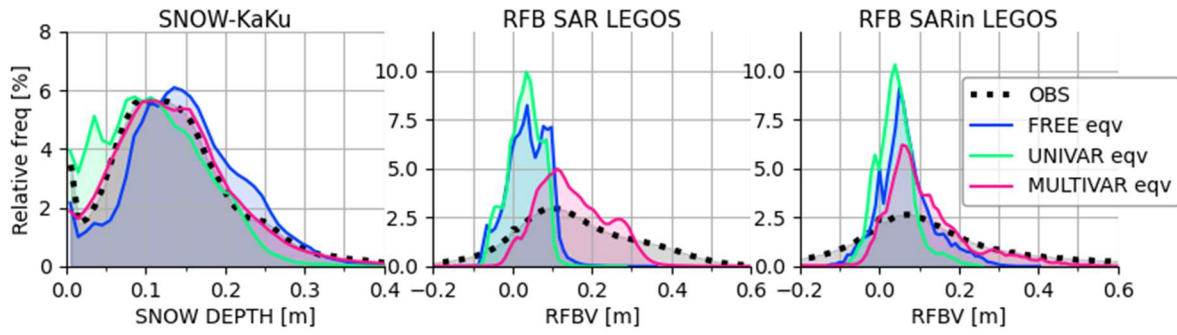

February 2018 Arctic snow volume differences relative to SNOW-KaKu

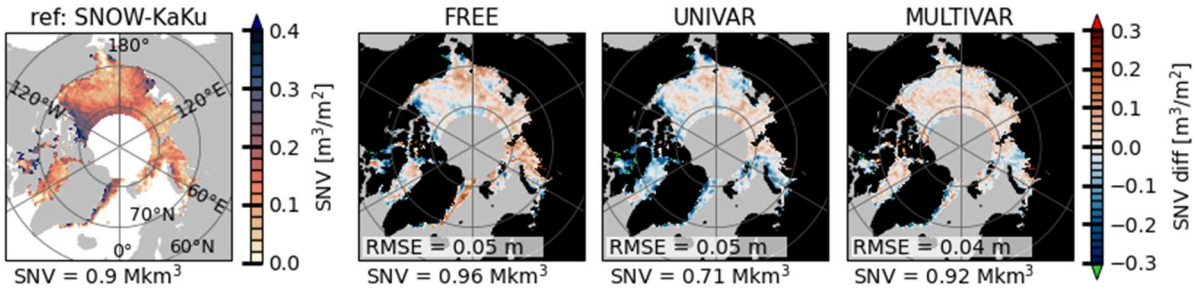

February 2018 Arctic radar freeboard volume differences relative to RFB LEGOS

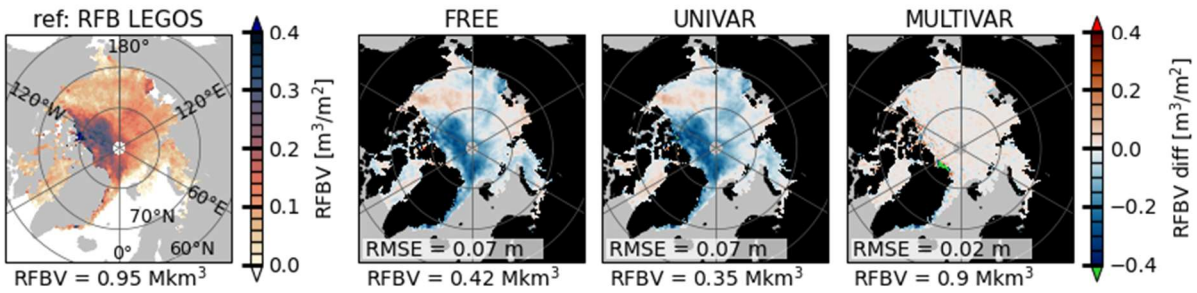



(a) March 2018 Arctic distributions

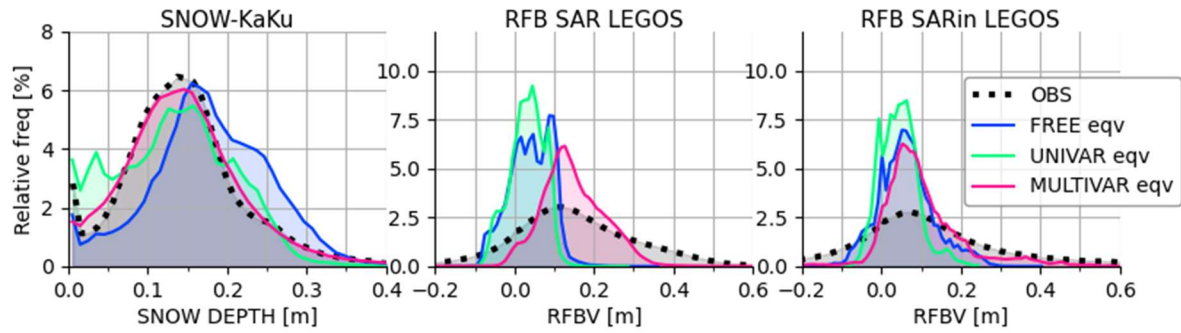

March 2018 Arctic snow volume differences relative to SNOW-KaKu

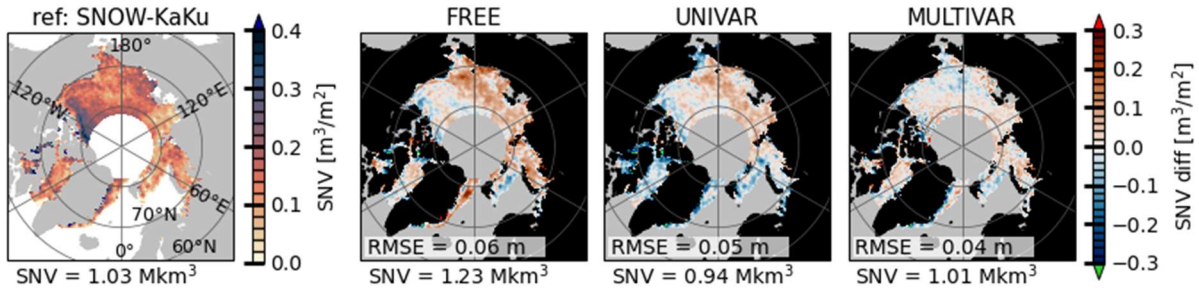

March 2018 Arctic radar freeboard volume differences relative to RFB LEGOS

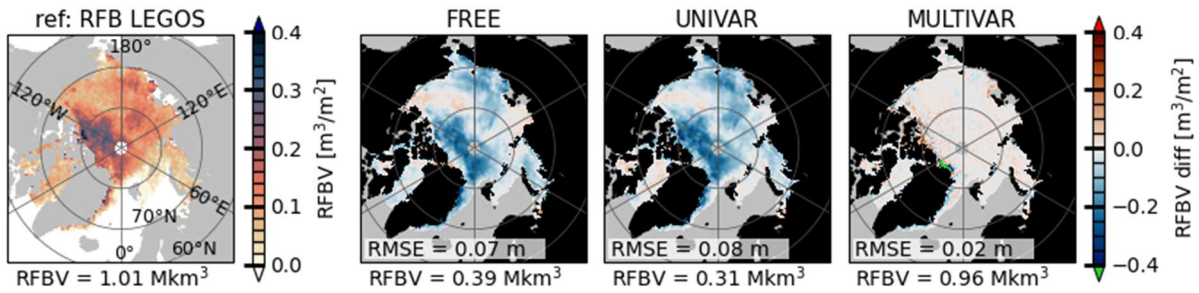

(a) April 2018 Arctic distributions

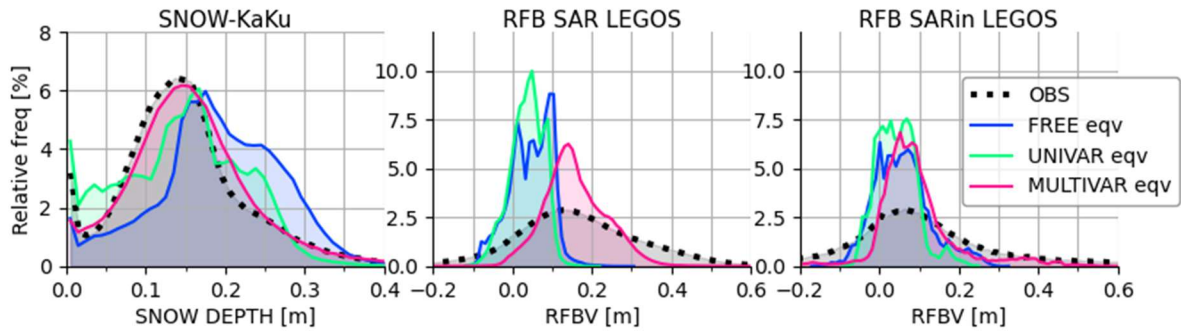

April 2018 Arctic snow volume differences relative to SNOW-KaKu

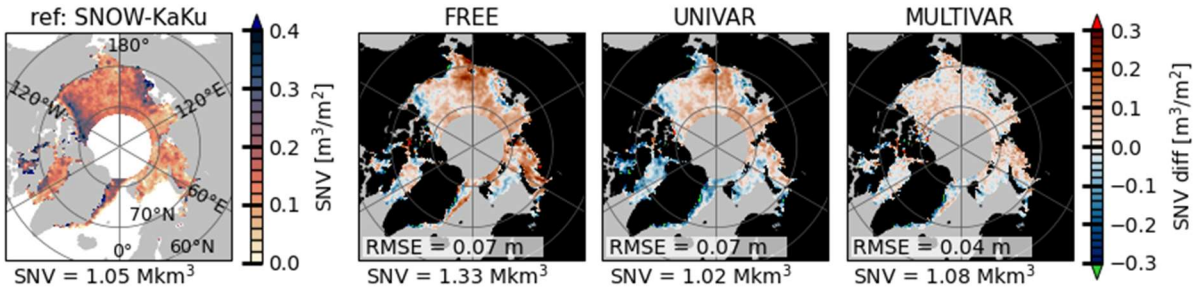

April 2018 Arctic radar freeboard volume differences relative to RFB LEGOS

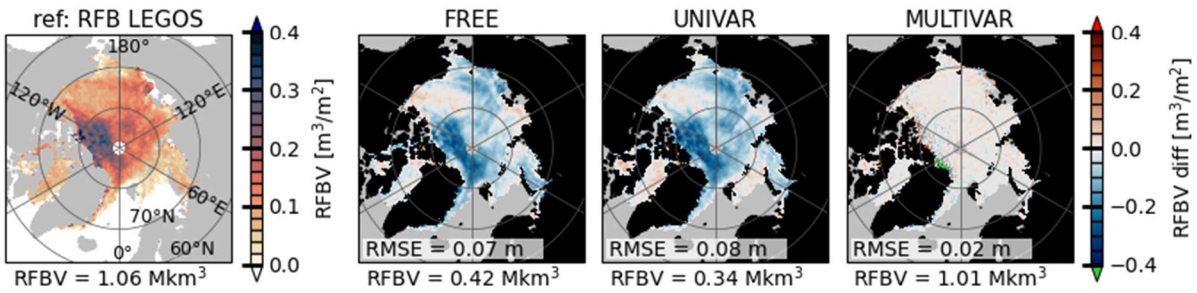

(a) November 2018 Arctic distributions

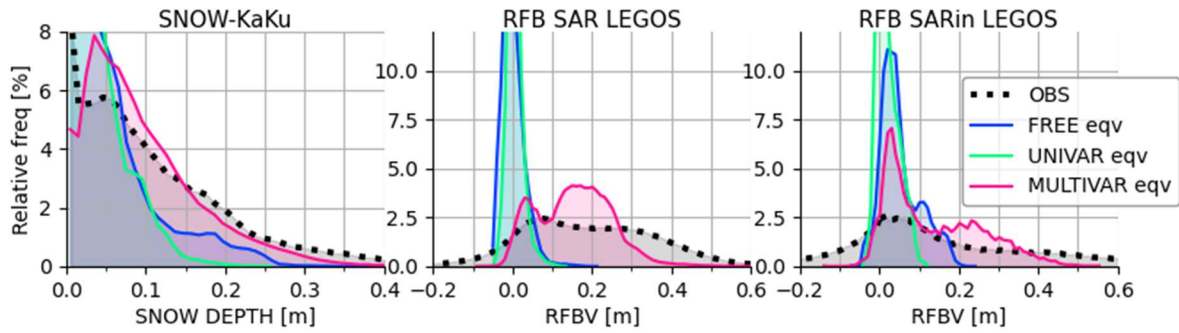

November 2018 Arctic snow volume differences relative to SNOW-KaKu

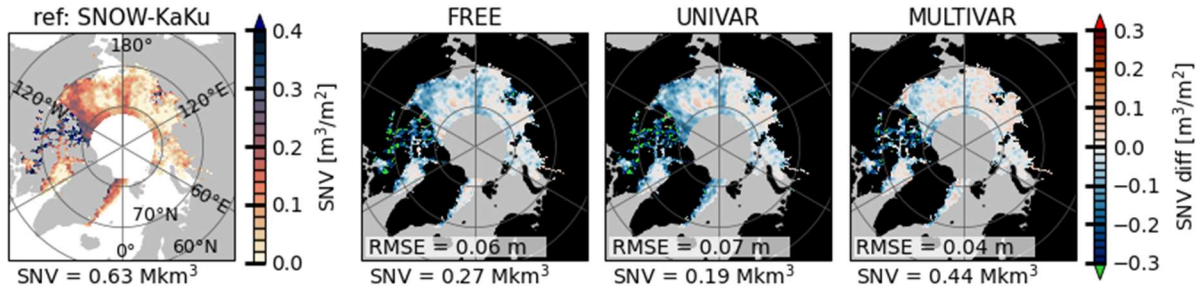

November 2018 Arctic radar freeboard volume differences relative to RFB LEGOS

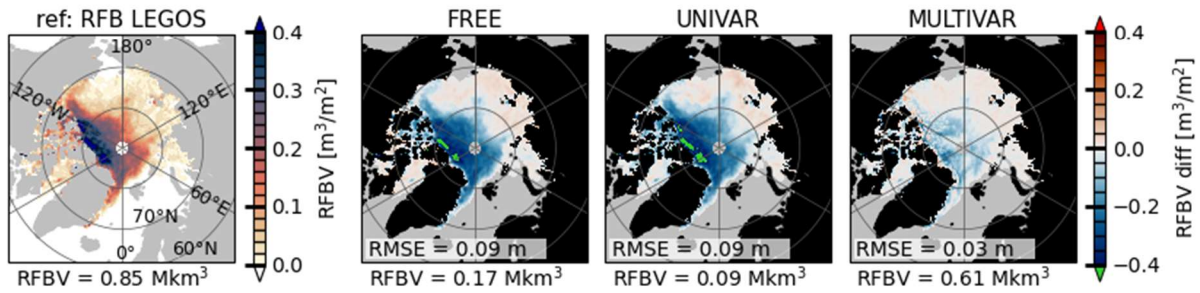



(a) December 2018 Arctic distributions

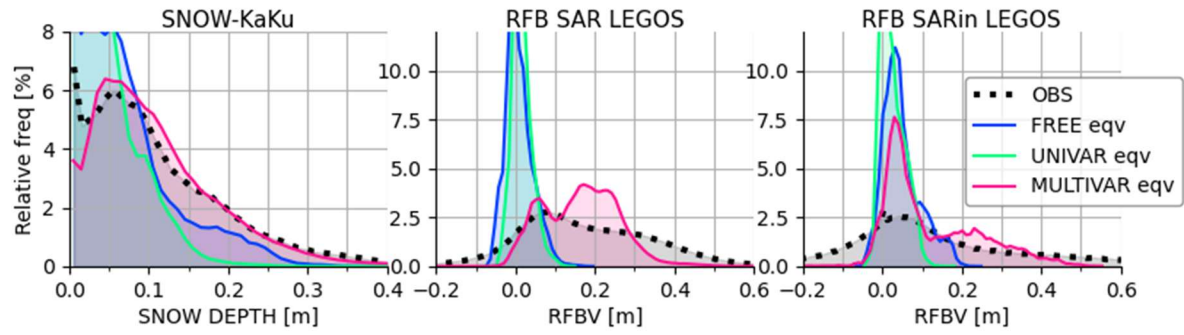

December 2018 Arctic snow volume differences relative to SNOW-KaKu

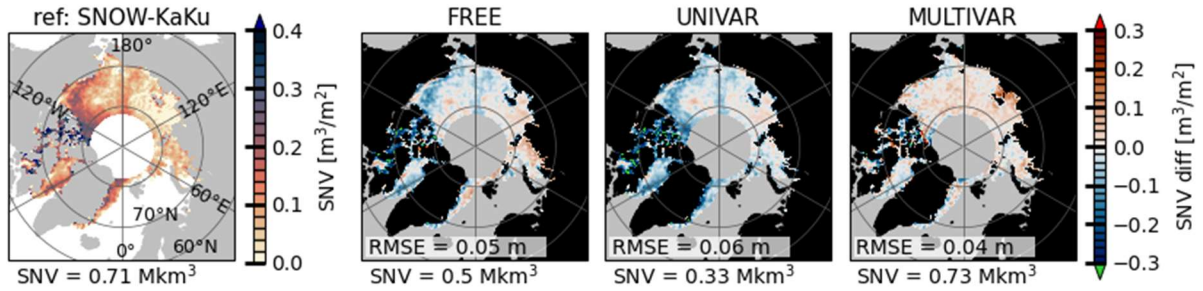

December 2018 Arctic radar freeboard volume differences relative to RFB LEGOS

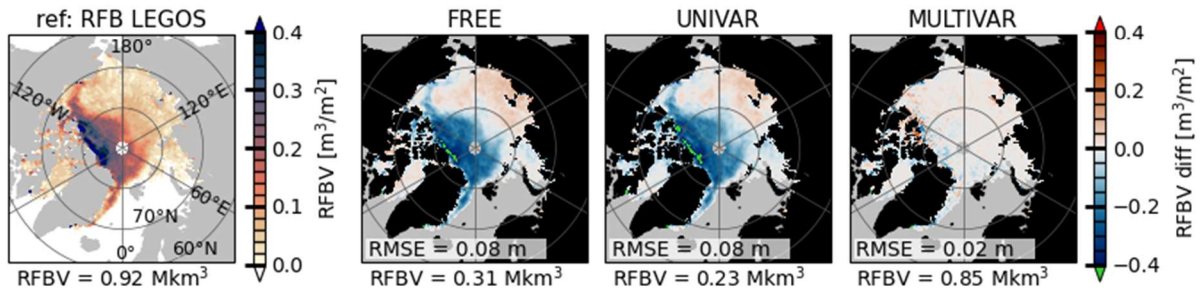

(a) January 2019 Arctic distributions

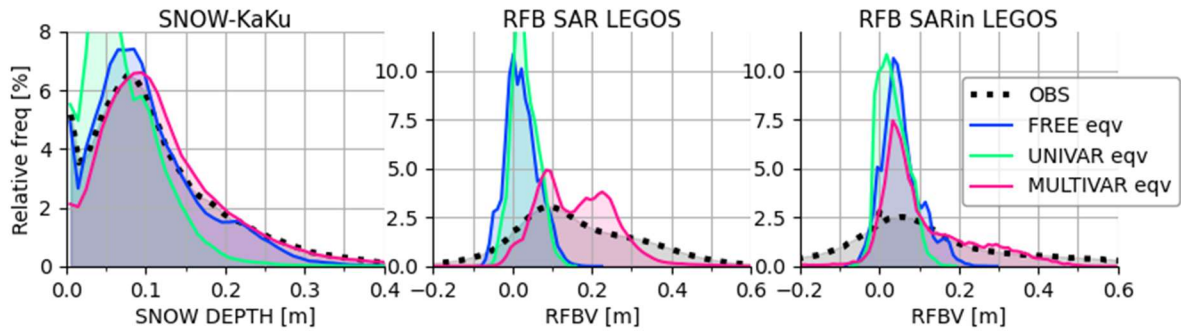

January 2019 Arctic snow volume differences relative to SNOW-KaKu

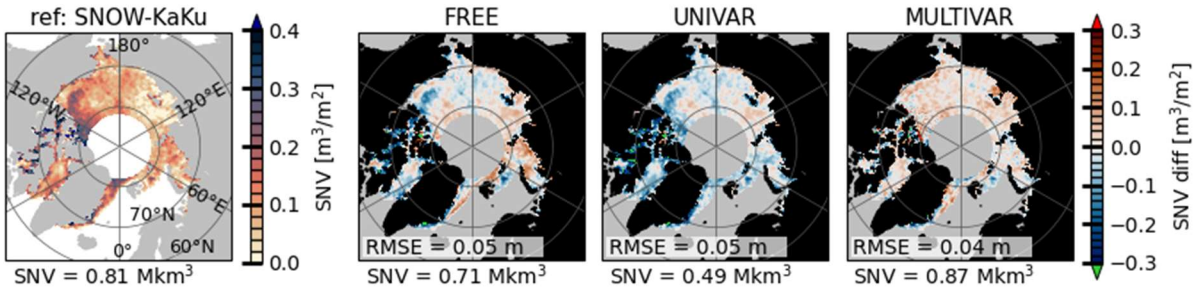

January 2019 Arctic radar freeboard volume differences relative to RFB LEGOS

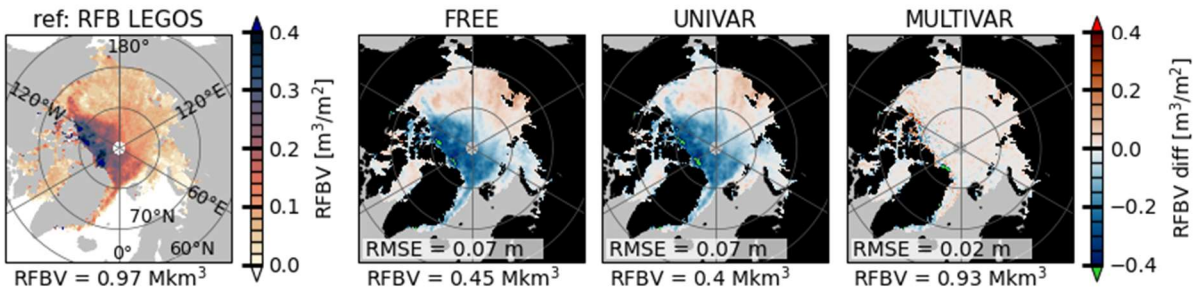

(a) February 2019 Arctic distributions

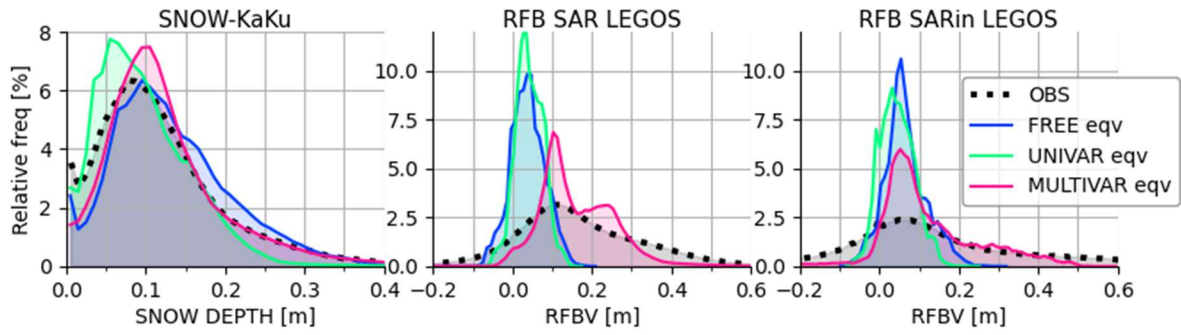

February 2019 Arctic snow volume differences relative to SNOW-KaKu

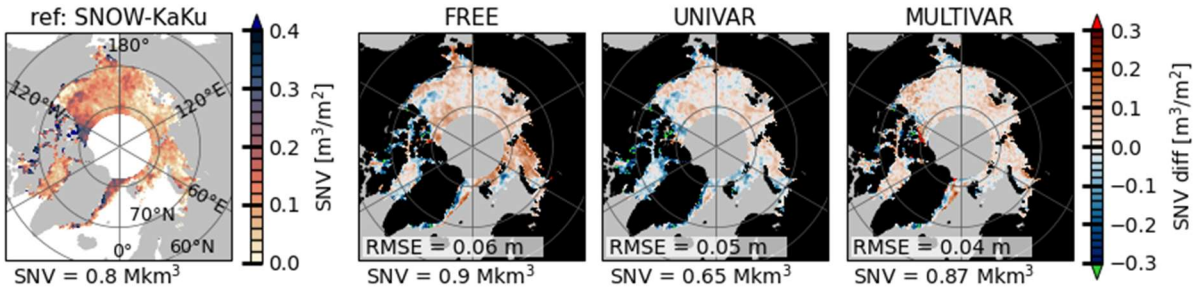

February 2019 Arctic radar freeboard volume differences relative to RFB LEGOS

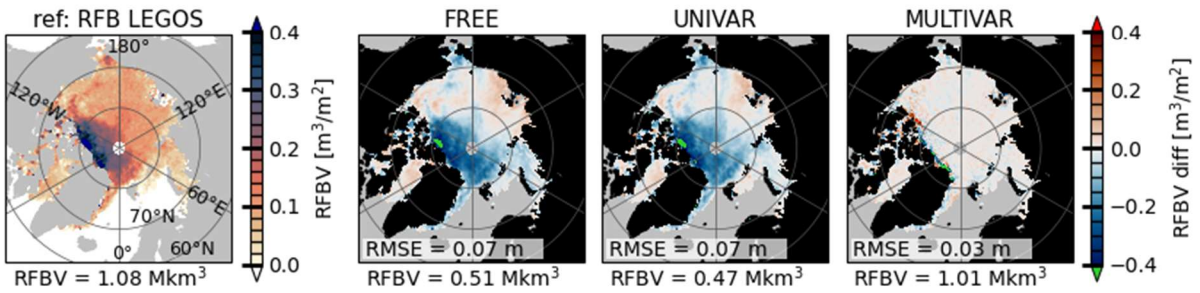



### **Radar Freeboard, snow thickness and probability density function in the Antarctic.**

The following figures, similar to Figure 4 in the manuscript, display radar freeboard, snow thickness and probability functions in the Antarctic for the periods May 2017-October 2017 and May 2018-October 2018. Top panels (a): Probability density functions (%) of the snow thickness, the radar freeboard SAR and radar freeboard SARin observations (dotted black) and their model equivalent for the FREE (blue), UNIVAR (green) and MULTIVAR (pink) experiments in the Arctic. Middle (b), resp. bottom (c), row panels: snow volume per unit area [ $\text{m}^3/\text{m}^2$ ], resp. radar freeboard volume per unit area, from SNOW-KaKu, resp. RFB LEGOS, (first column) and differences with FREE, UNIVAR and MULTIVAR experiments. Total snow and RFB volumes values and root mean squared difference (RMS) are provided under each map.

(a) May 2017 Antarctic distributions

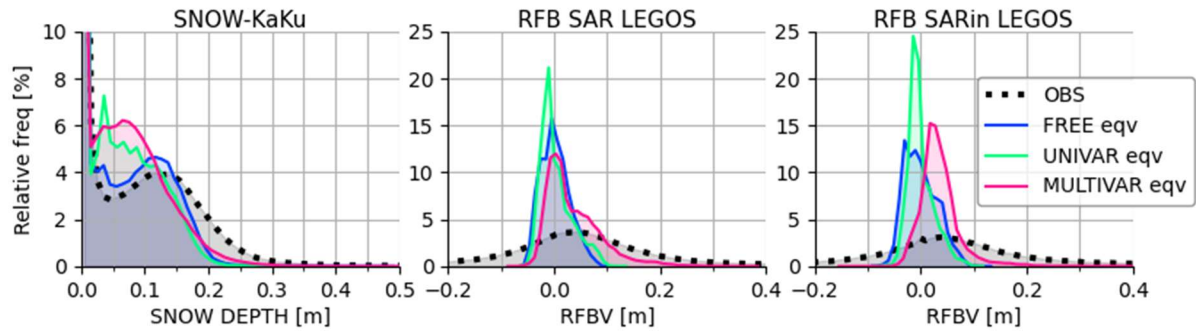

May 2017 Antarctic snow volume differences relative to SNOW-KaKu

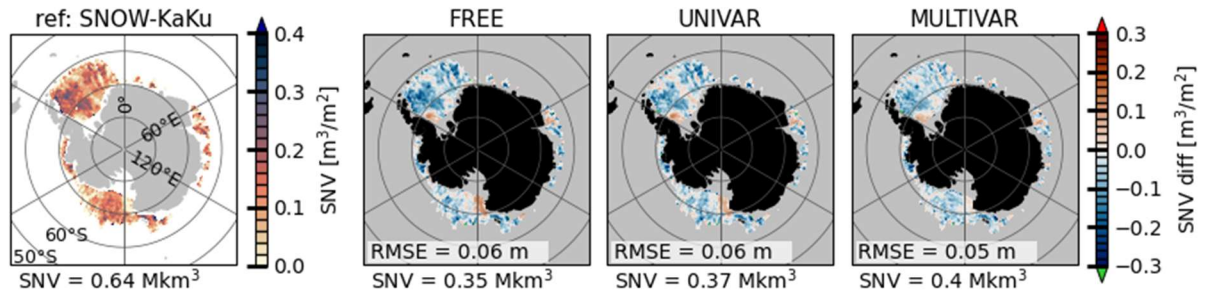

May 2017 Antarctic radar freeboard volume differences relative to RFB LEGOS

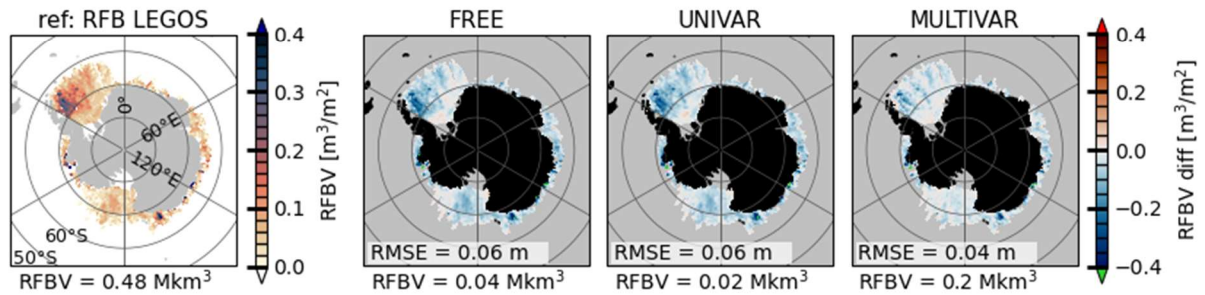

(a) June 2017 Antarctic distributions

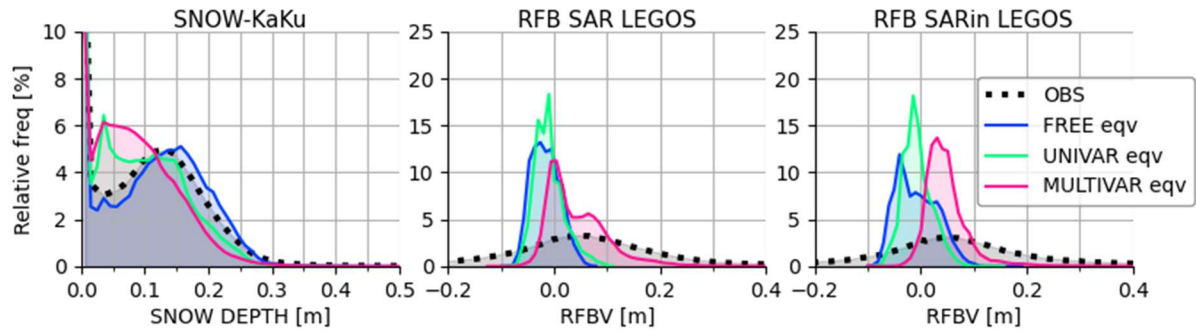

June 2017 Antarctic snow volume differences relative to SNOW-KaKu

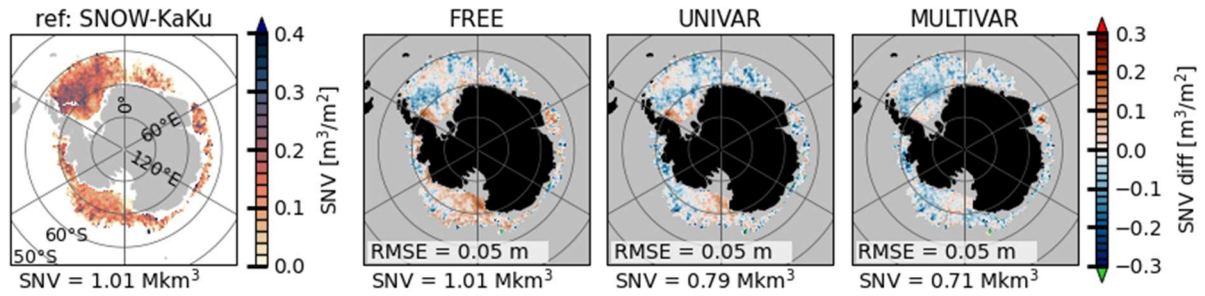

June 2017 Antarctic radar freeboard volume differences relative to RFB LEGOS

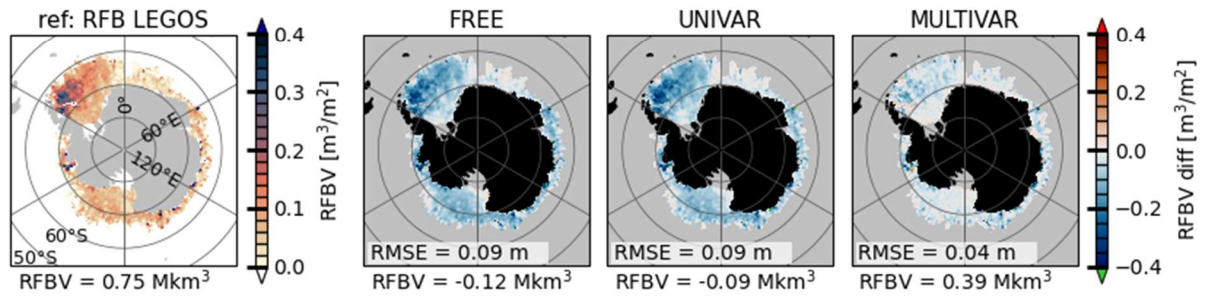



(a) July 2017 Antarctic distributions

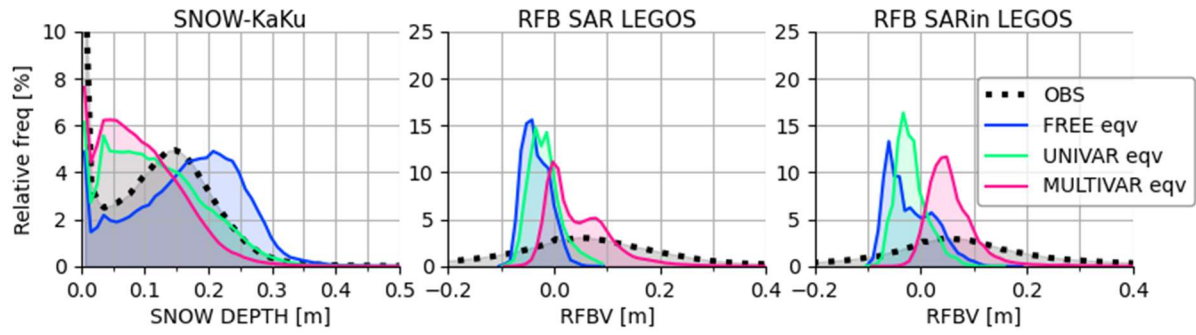

July 2017 Antarctic snow volume differences relative to SNOW-KaKu

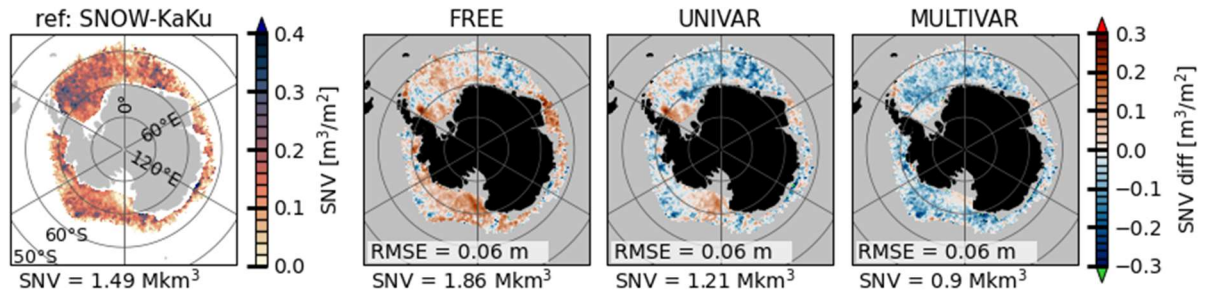

July 2017 Antarctic radar freeboard volume differences relative to RFB LEGOS

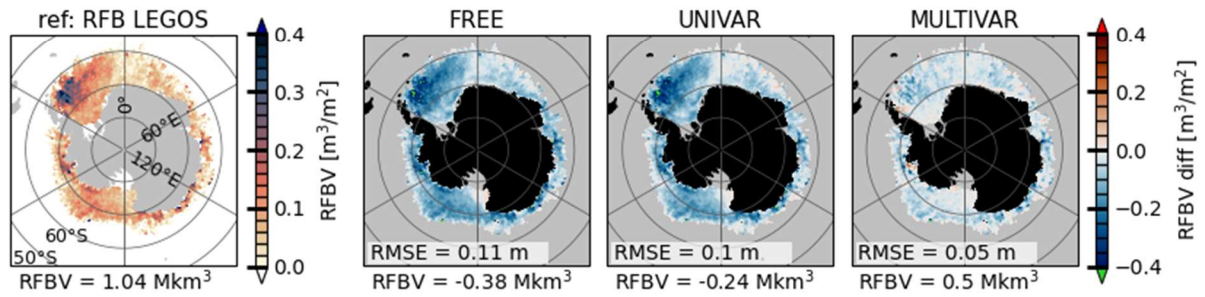

(a) August 2017 Antarctic distributions

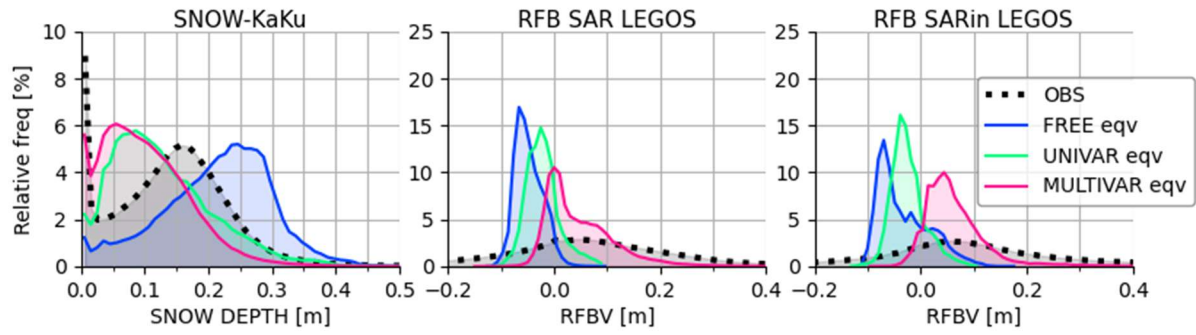

August 2017 Antarctic snow volume differences relative to SNOW-KaKu

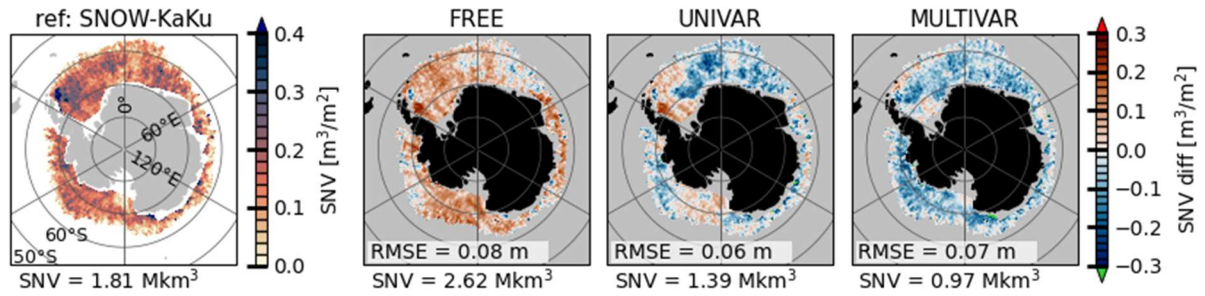

August 2017 Antarctic radar freeboard volume differences relative to RFB LEGOS

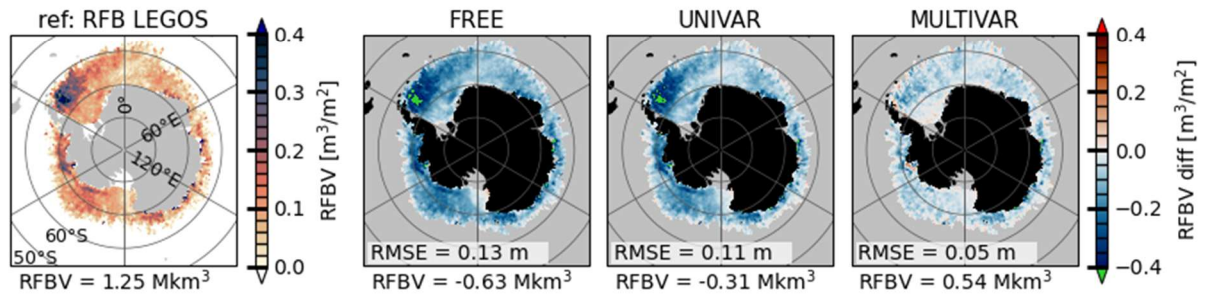

(a) September 2017 Antarctic distributions

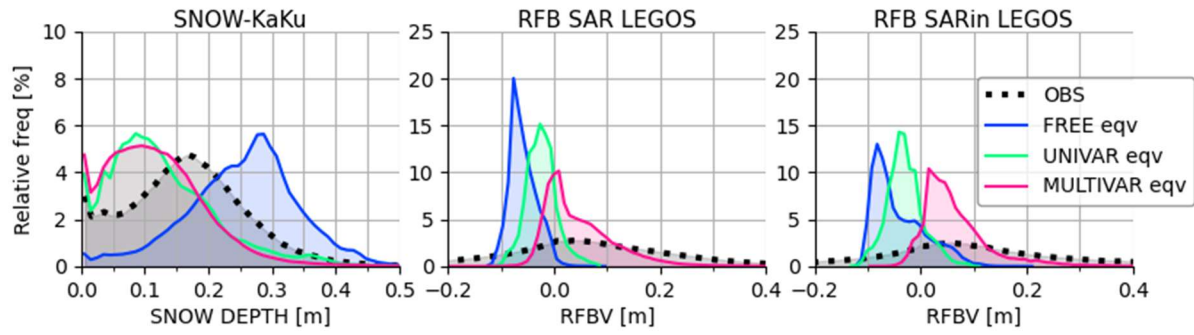

September 2017 Antarctic snow volume differences relative to SNOW-KaKu

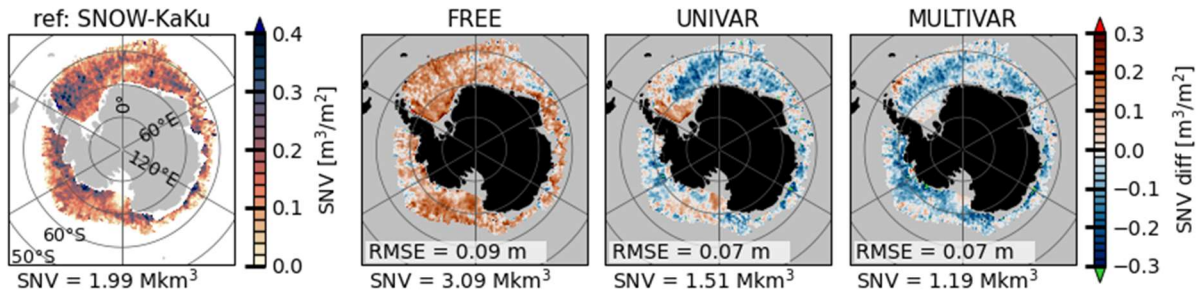

September 2017 Antarctic radar freeboard volume differences relative to RFB LEGOS

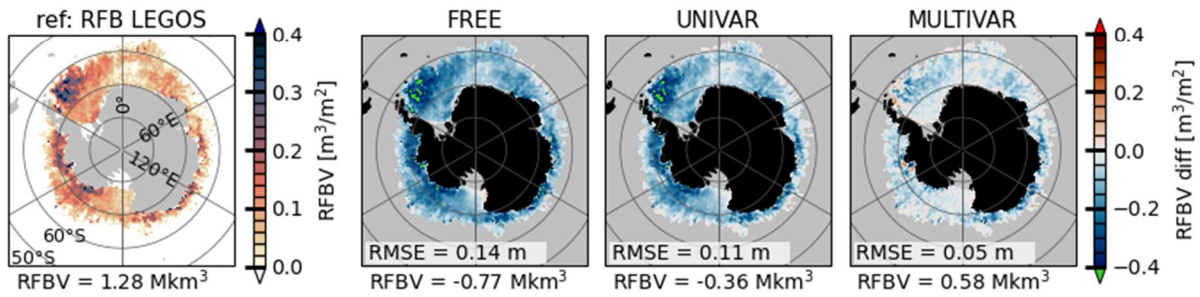



(a) October 2017 Antarctic distributions

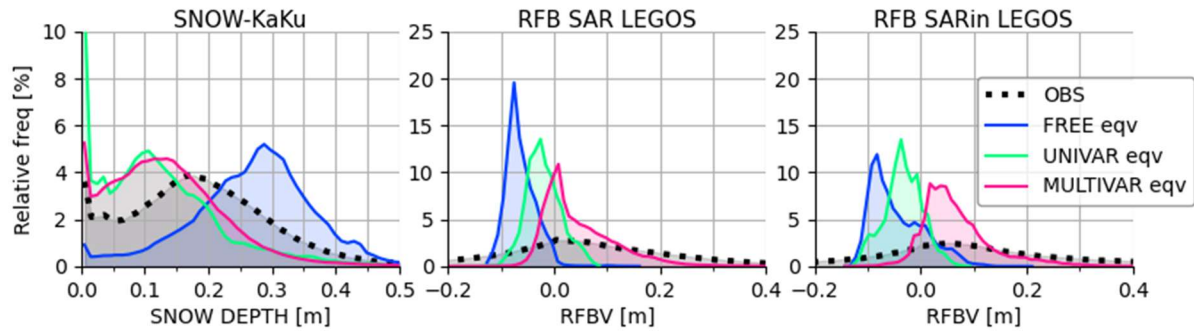

October 2017 Antarctic snow volume differences relative to SNOW-KaKu

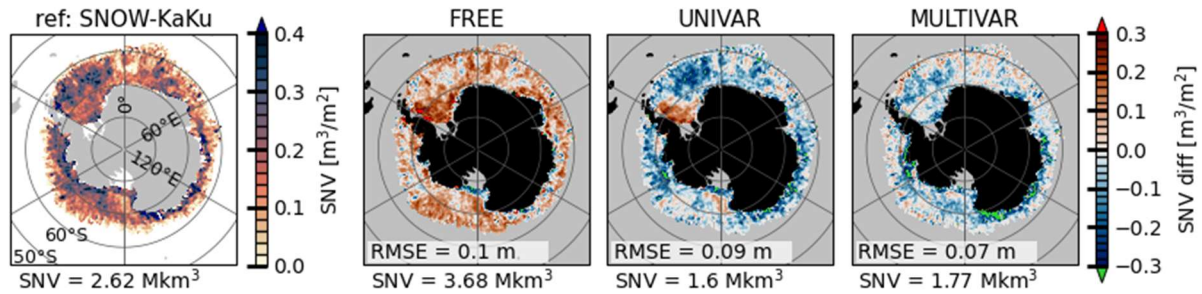

October 2017 Antarctic radar freeboard volume differences relative to RFB LEGOS

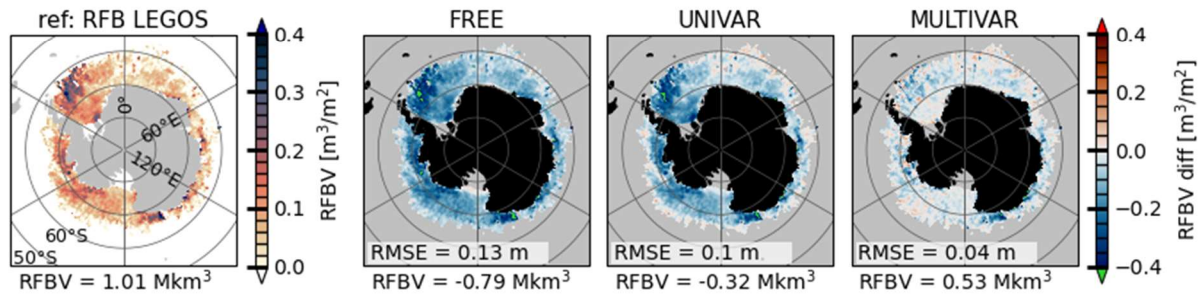

(a) May 2018 Antarctic distributions

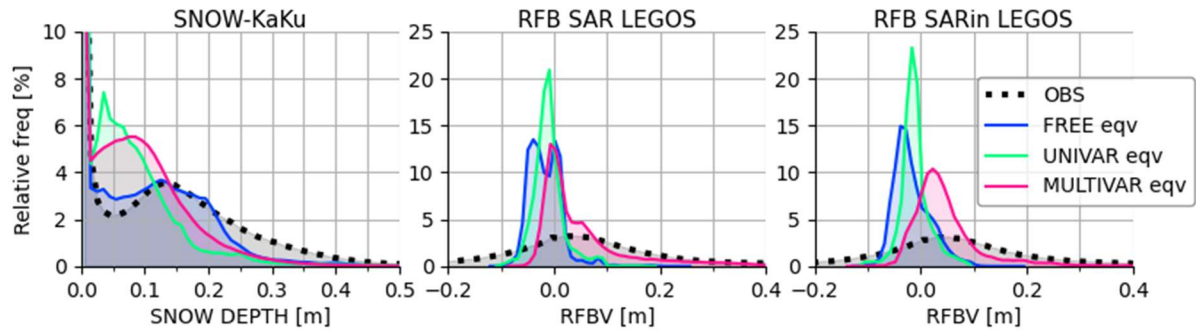

May 2018 Antarctic snow volume differences relative to SNOW-KaKu

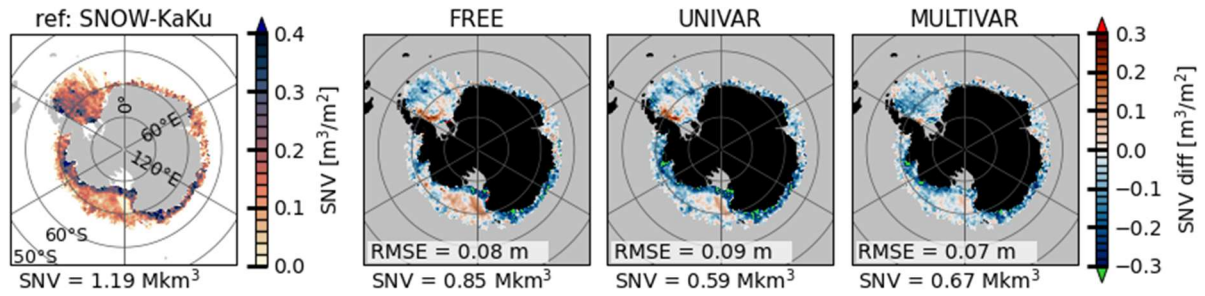

May 2018 Antarctic radar freeboard volume differences relative to RFB LEGOS

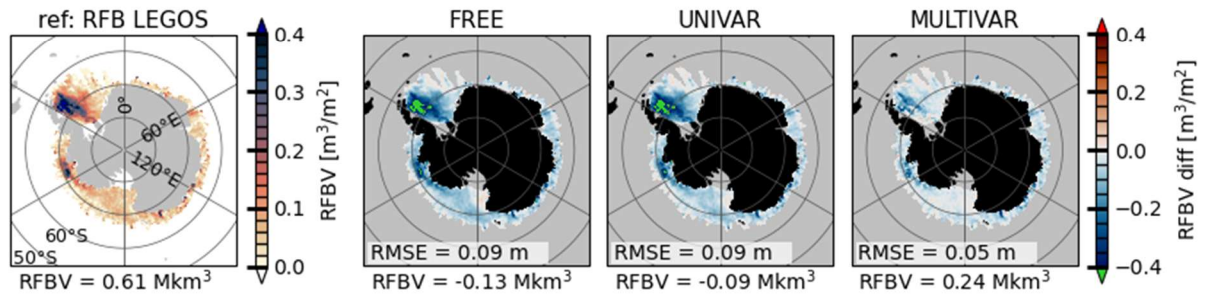

(a) June 2018 Antarctic distributions

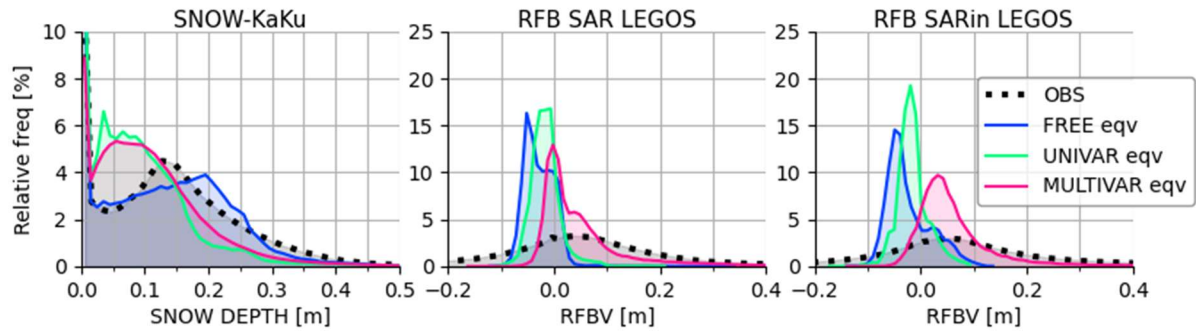

June 2018 Antarctic snow volume differences relative to SNOW-KaKu

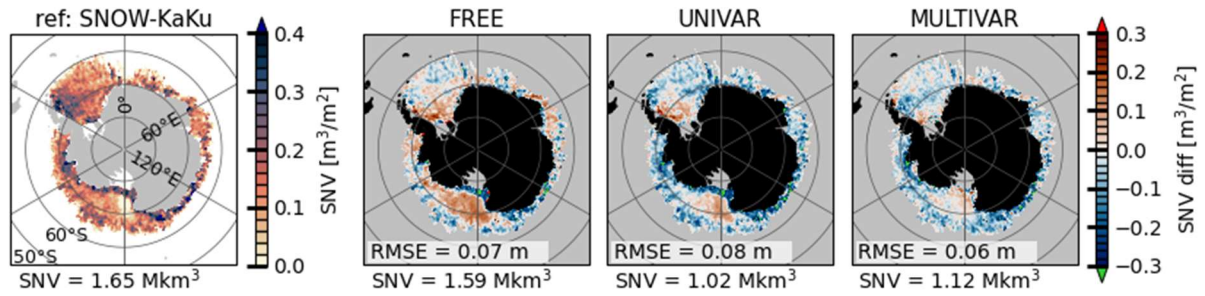

June 2018 Antarctic radar freeboard volume differences relative to RFB LEGOS

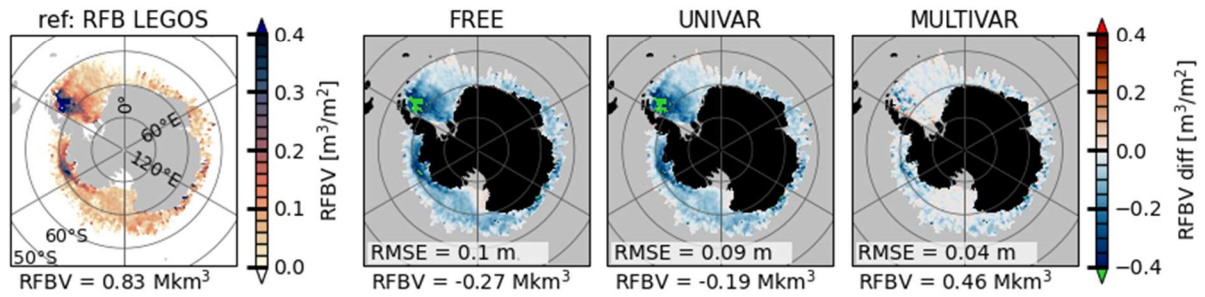



(a) July 2018 Antarctic distributions

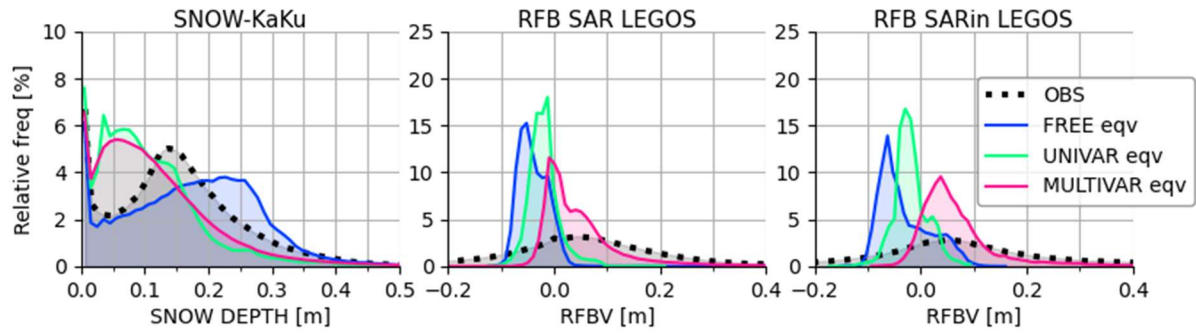

July 2018 Antarctic snow volume differences relative to SNOW-KaKu

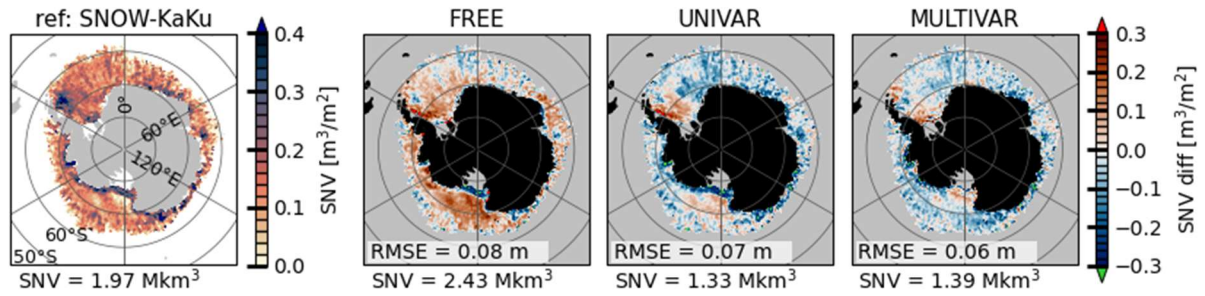

July 2018 Antarctic radar freeboard volume differences relative to RFB LEGOS

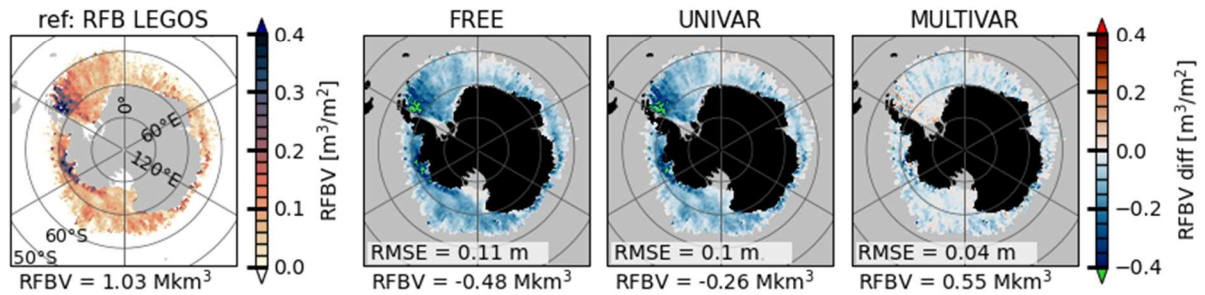

(a) August 2018 Antarctic distributions

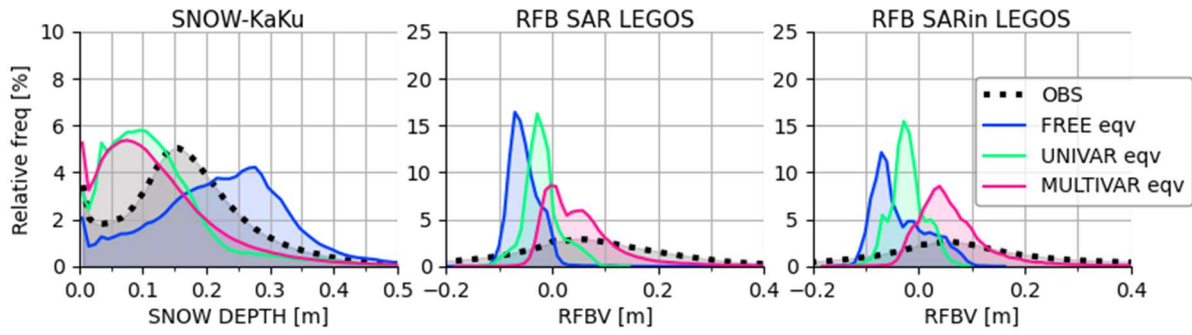

August 2018 Antarctic snow volume differences relative to SNOW-KaKu

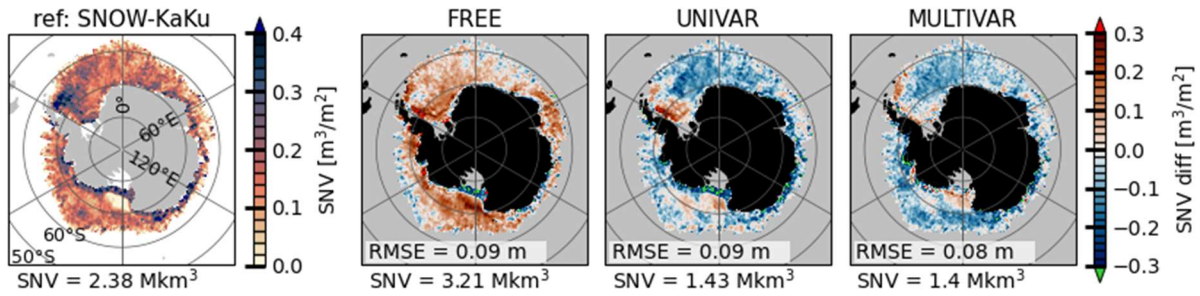

August 2018 Antarctic radar freeboard volume differences relative to RFB LEGOS

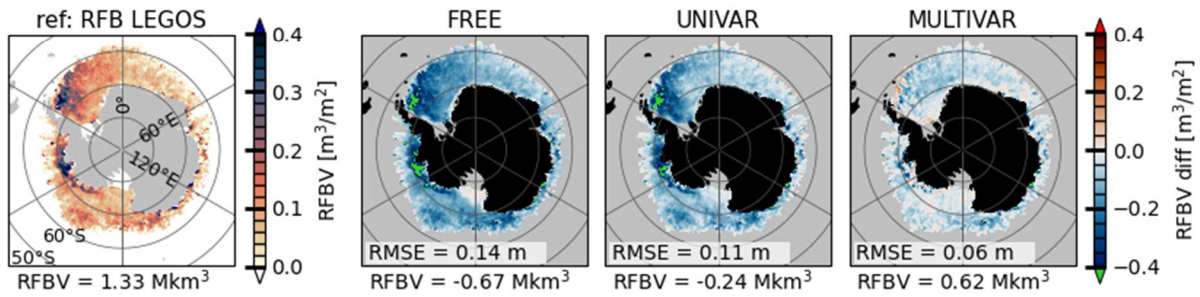

(a) September 2018 Antarctic distributions

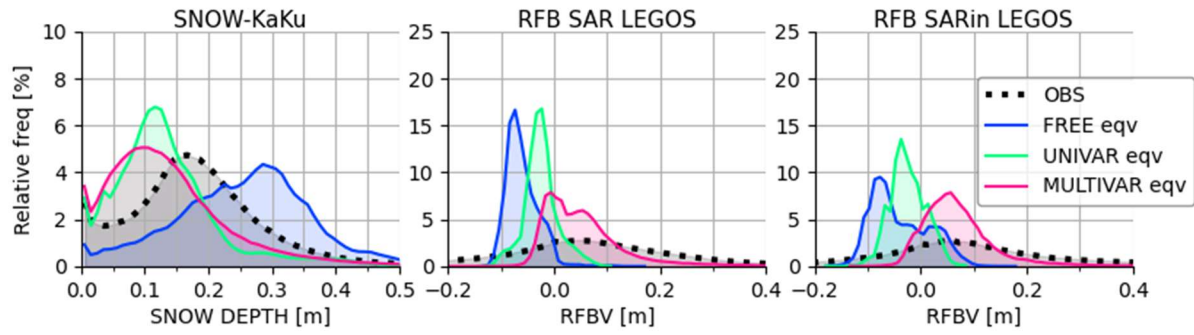

September 2018 Antarctic snow volume differences relative to SNOW-KaKu

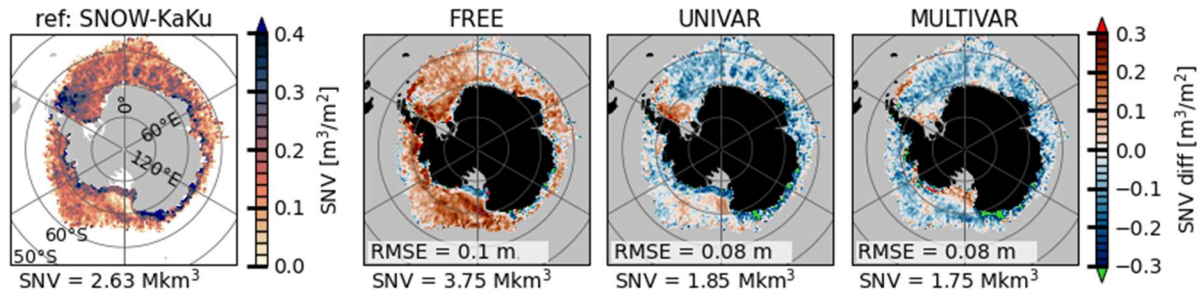

September 2018 Antarctic radar freeboard volume differences relative to RFB LEGOS

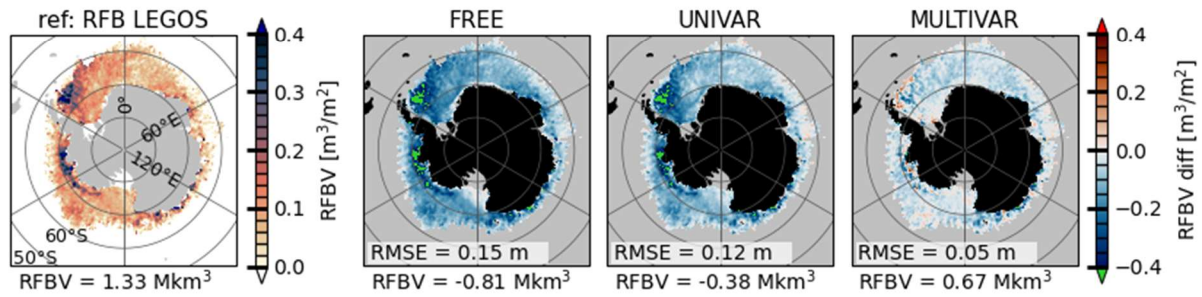



(a) October 2018 Antarctic distributions

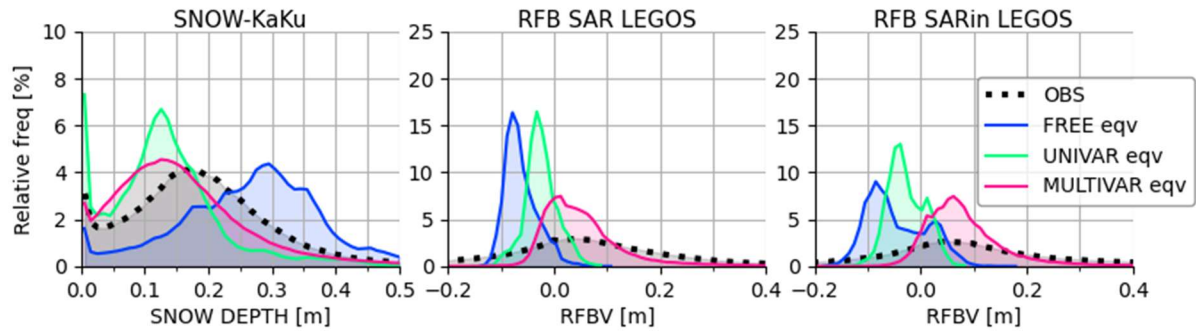

October 2018 Antarctic snow volume differences relative to SNOW-KaKu

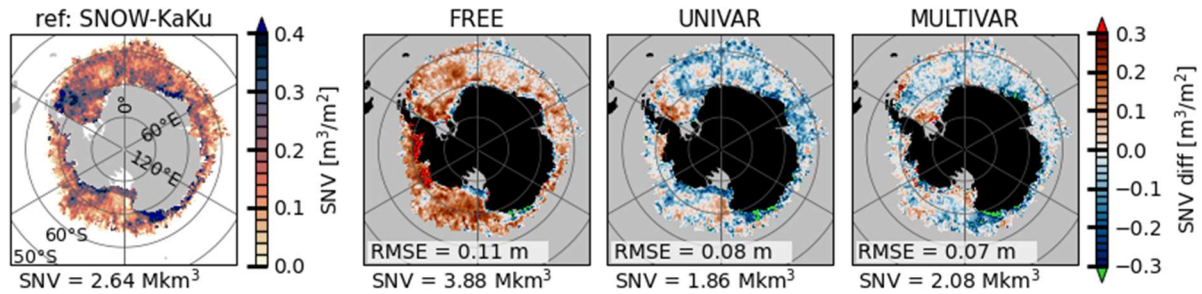

October 2018 Antarctic radar freeboard volume differences relative to RFB LEGOS

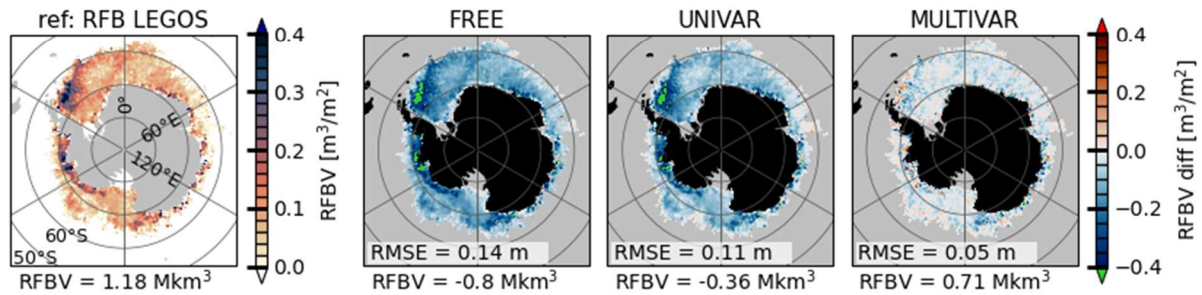

## Sea ice volume in the Arctic

The following figures, similar to Figure 8 in the manuscript, display monthly sea ice volume with tables of statistics in the Arctic for the periods January 2017-April 2017, November 2017-April 2018 and November 2018-February 2019.. Monthly sea ice volume for CS2SMOS dataset (reference) and its difference with the FREE, UNIVAR, and MULTIVAR experiments (first line) and the observations LEGOS\_og (original) and LEGOS\_md (with model constant densities). Table: root mean square error (RMS) and mean difference (MD) between FREE, UNIVAR, MULTIVAR, LEGOS\_og, LEGOS\_md and CS2SMOS data, calculated on the LEGOS zone and outside the LEGOS zone and for CS2SMOS sea ice thickness of less than or greater than 1m. The table colors highlight the values close to 0 (white) and the extremes (green for the RMS, and blue/red for the negative/positive MD).

January 2017 Arctic sea ice volume

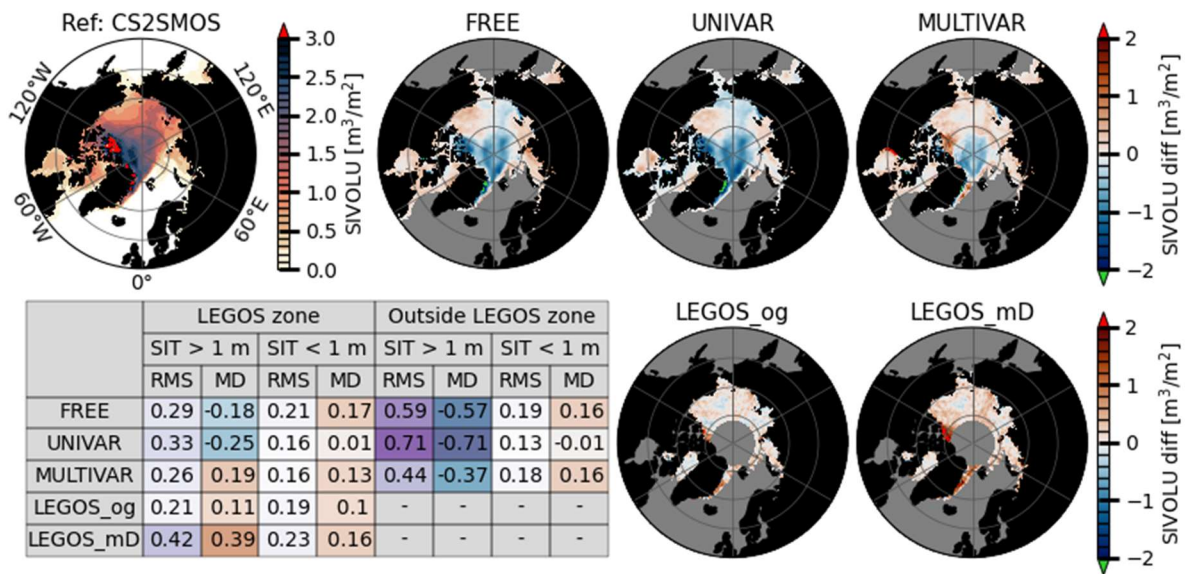

February 2017 Arctic sea ice volume

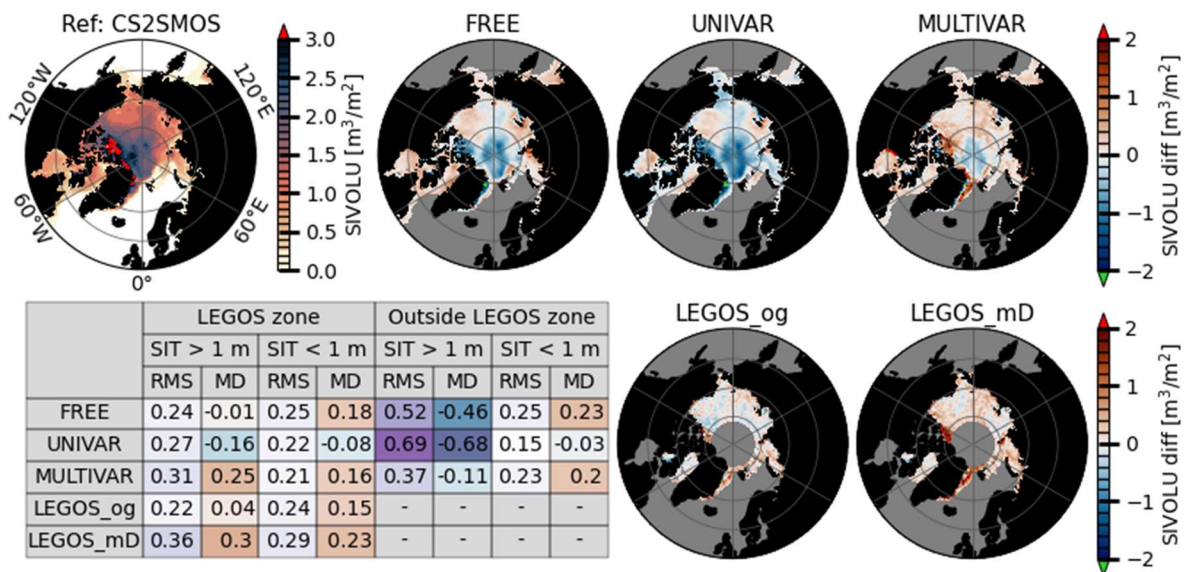

### March 2017 Arctic sea ice volume

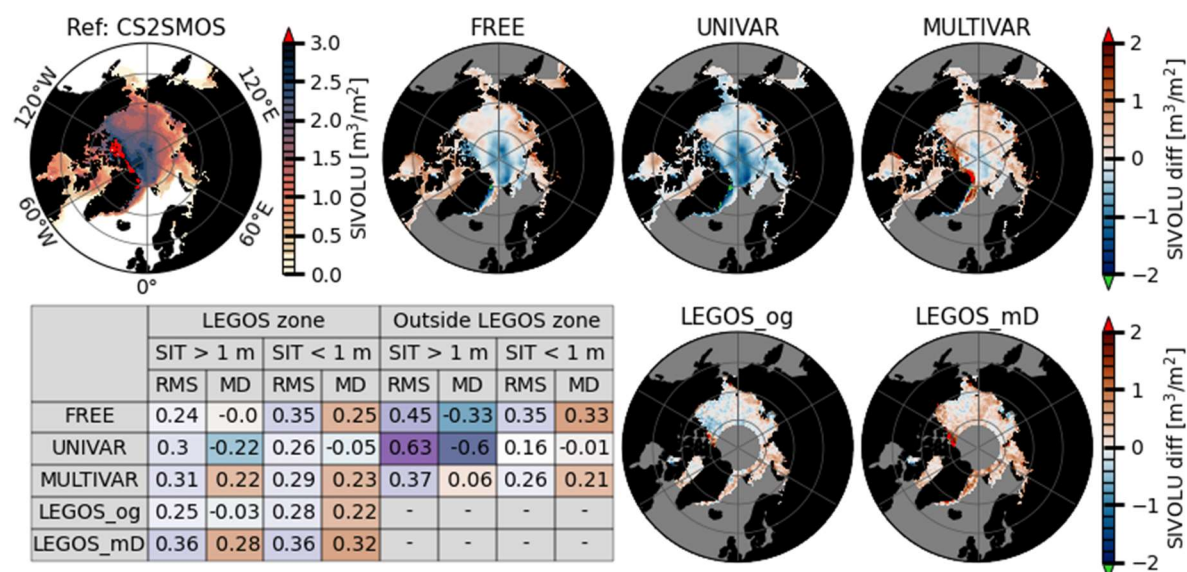

### April 2017 Arctic sea ice volume

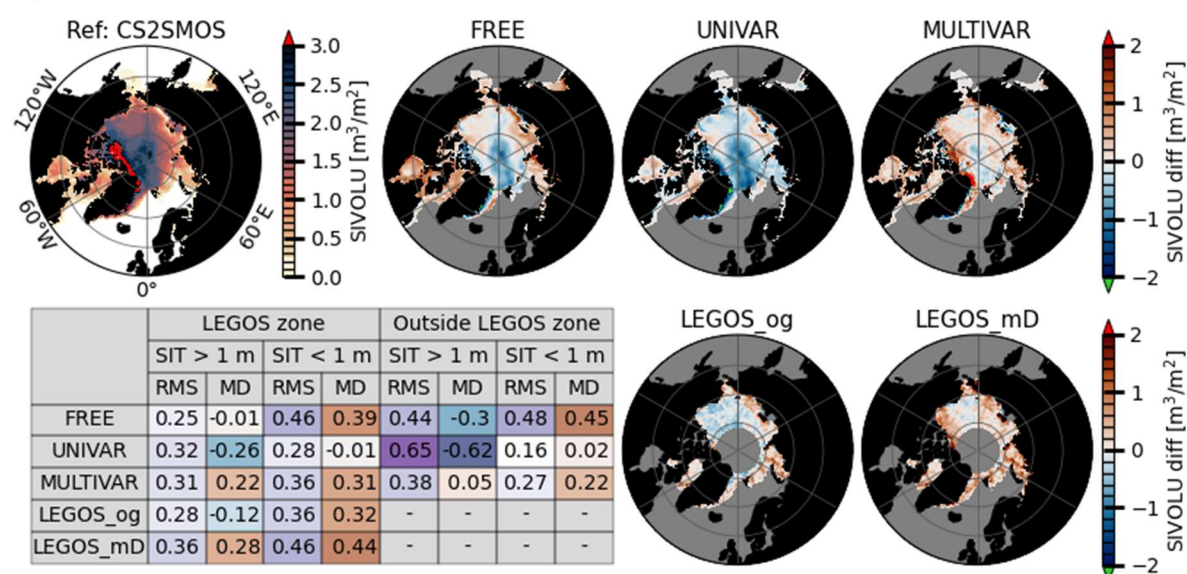



# November 2017 Arctic sea ice volume

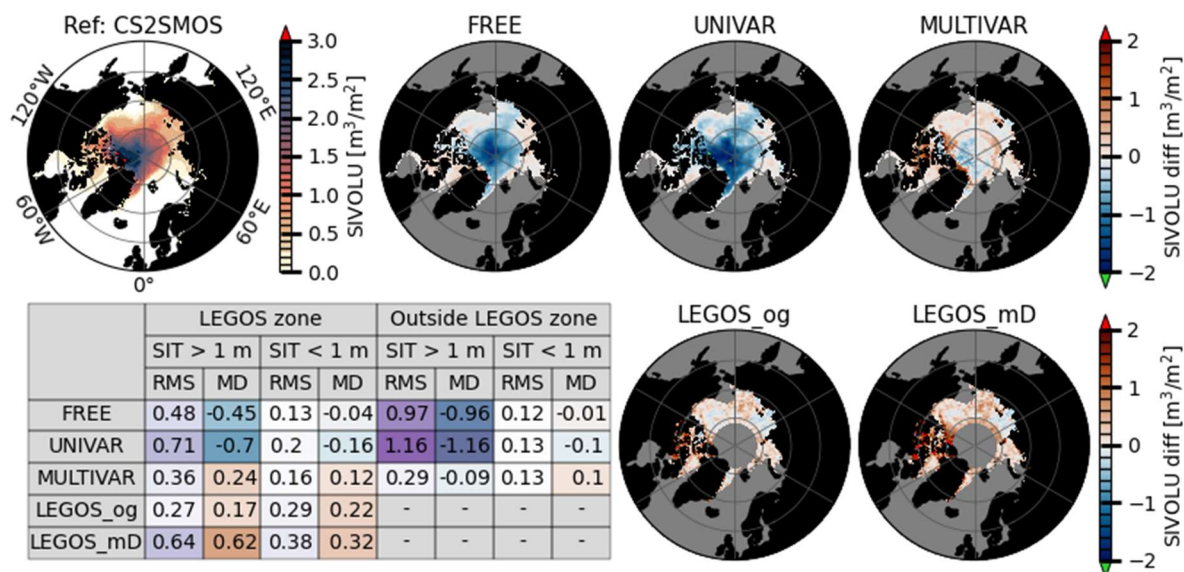

# December 2017 Arctic sea ice volume

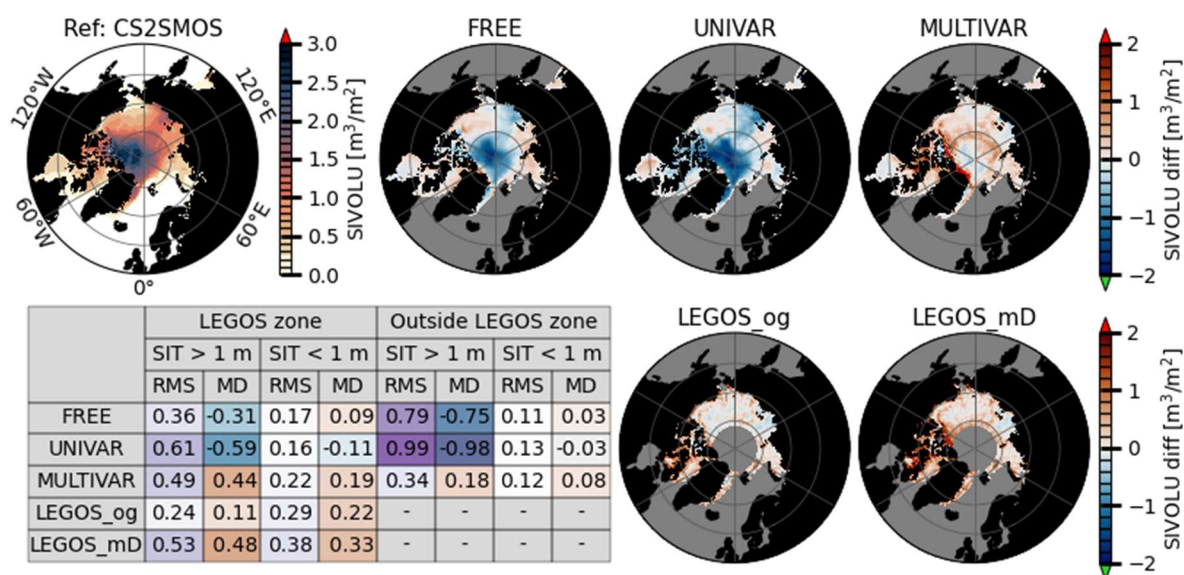

# January 2018 Arctic sea ice volume

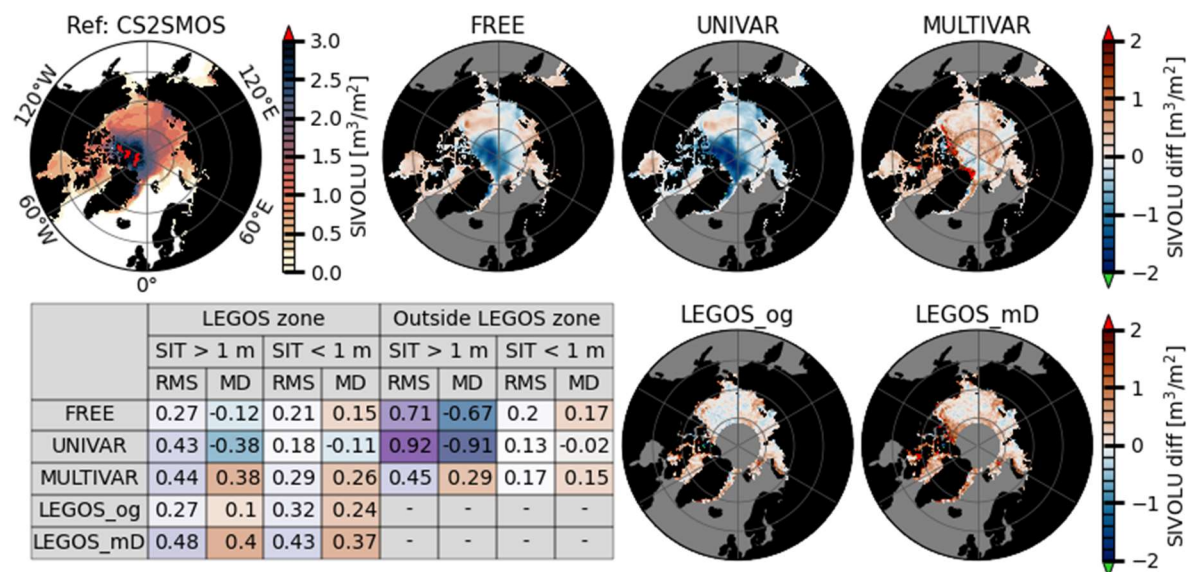

# February 2018 Arctic sea ice volume

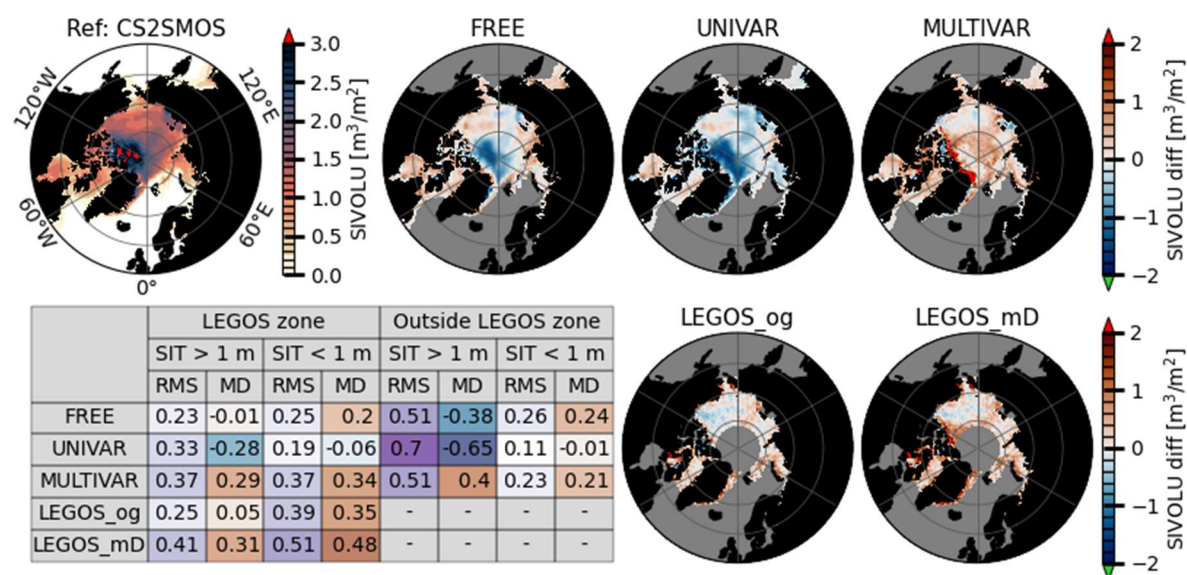

### March 2018 Arctic sea ice volume

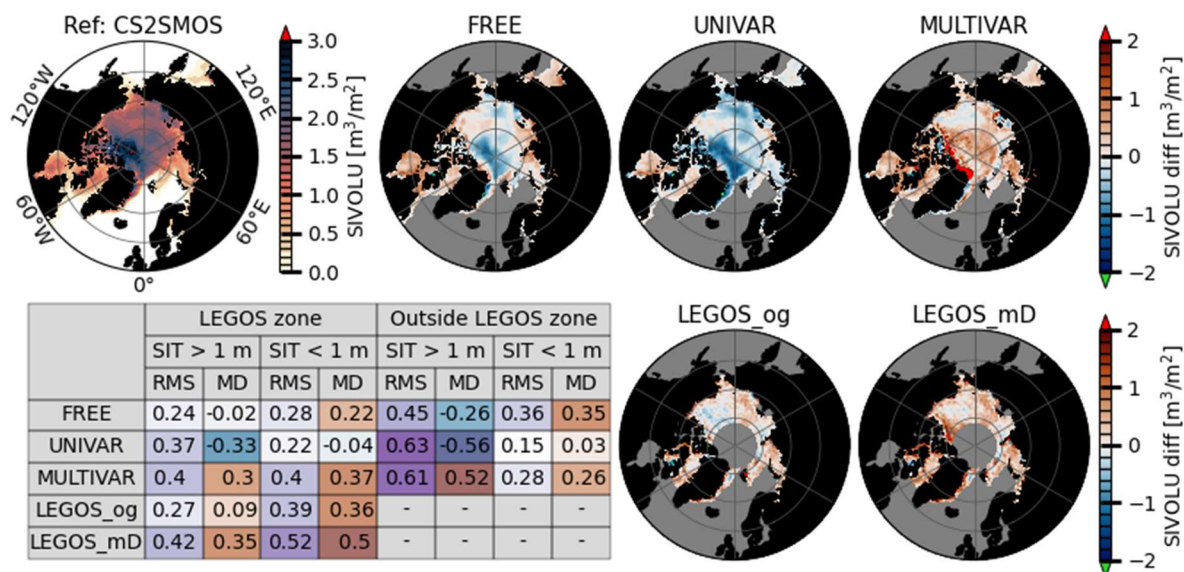

### April 2018 Arctic sea ice volume

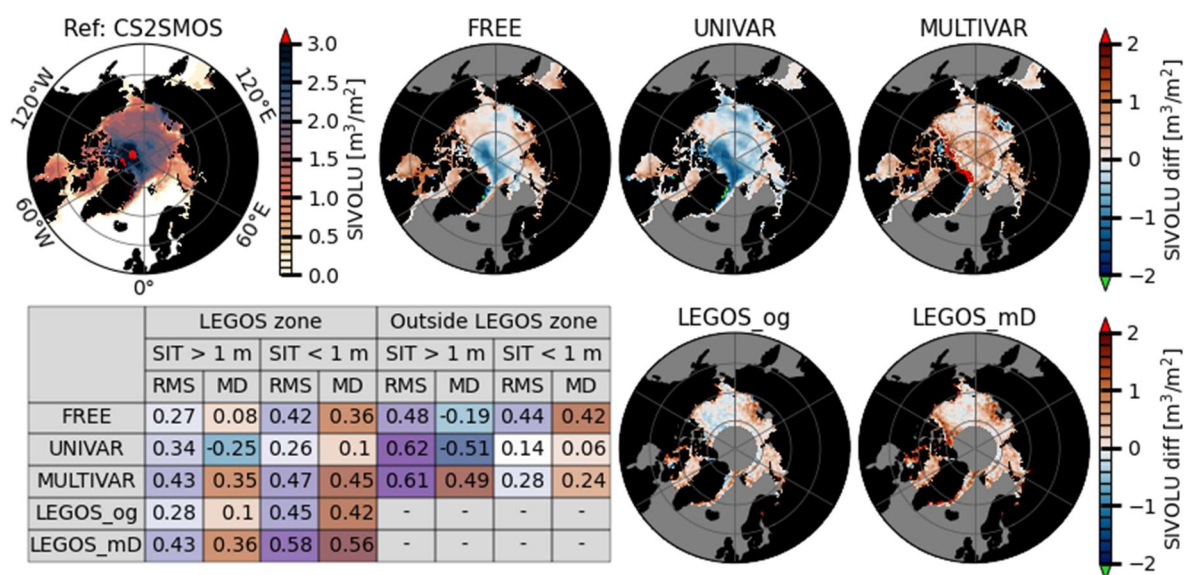



# November 2018 Arctic sea ice volume

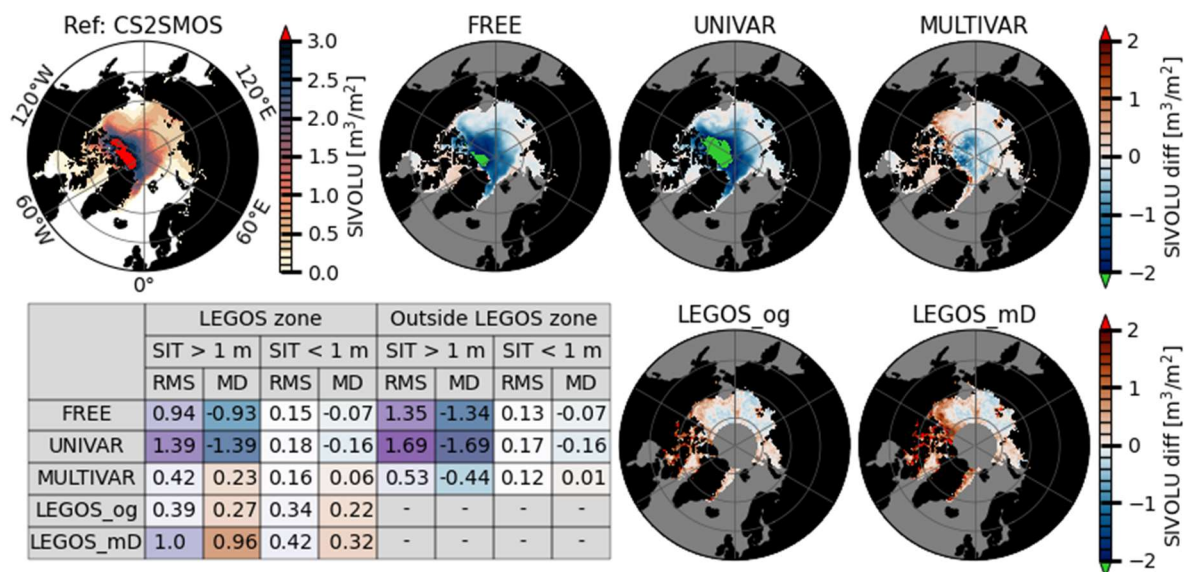

# December 2018 Arctic sea ice volume

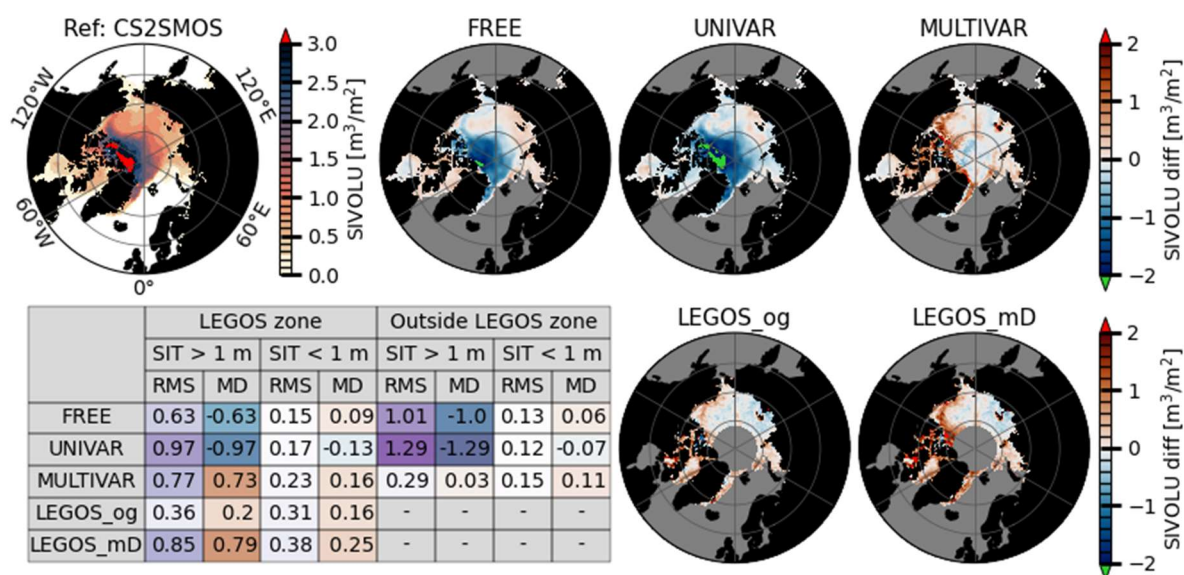

# January 2019 Arctic sea ice volume

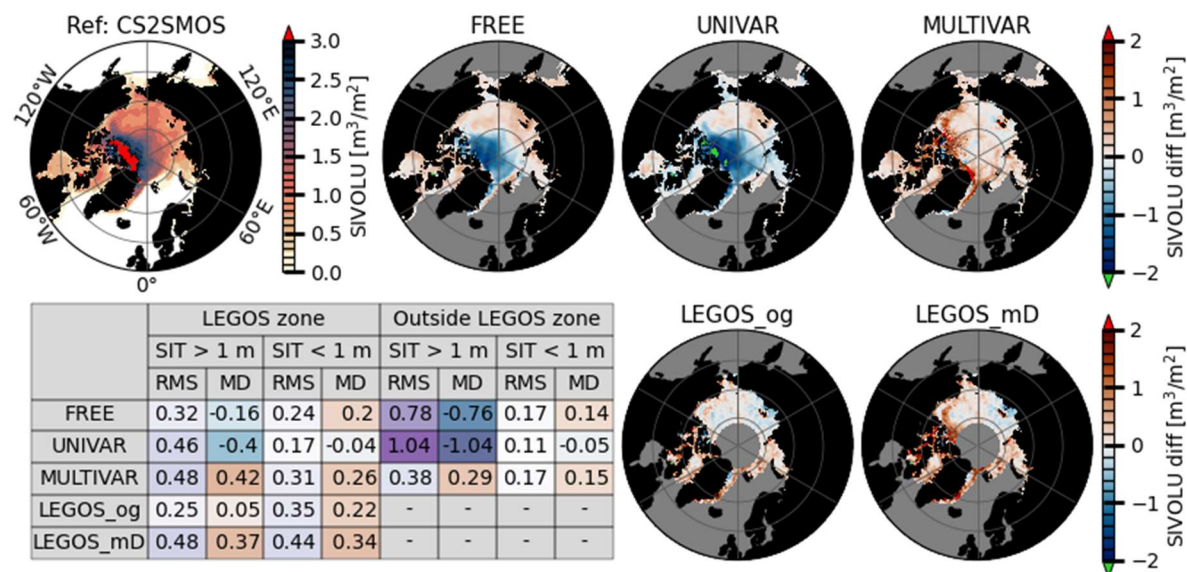

# February 2019 Arctic sea ice volume

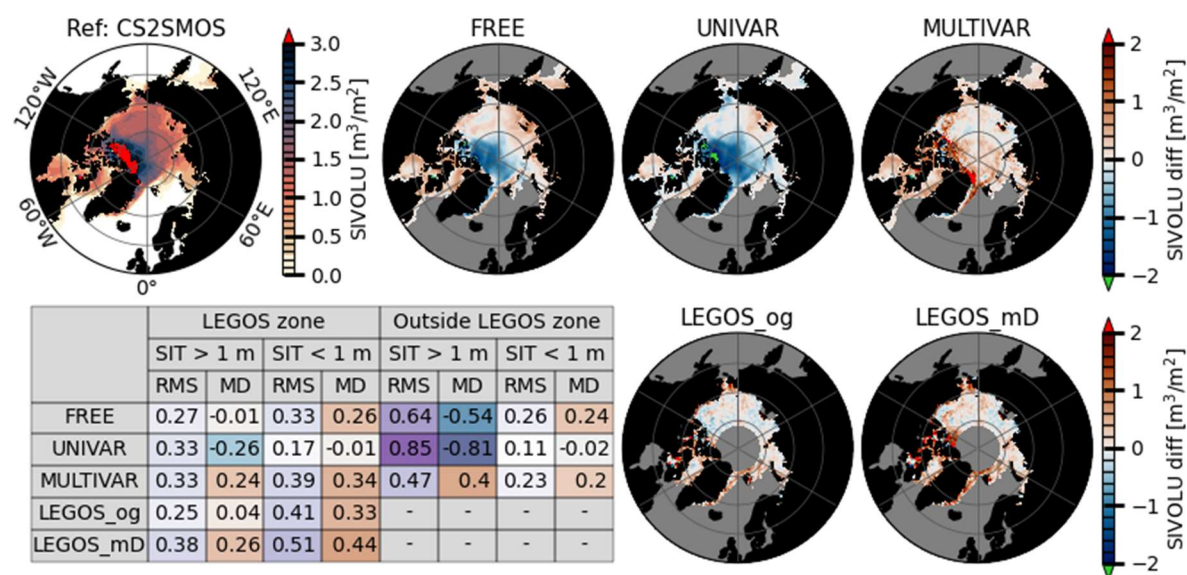

## Sea ice volume in the Antarctic

The following figures, similar to Figure 9 in the manuscript, display monthly sea ice volume with tables of statistics in the Antarctic for the periods May 2017-September 2017 and May 2018 – September 2018. Monthly sea ice volume for SMOS dataset (reference) and its difference with the FREE, UNIVAR, and MULTIVAR experiments (first line) and the observations LEGOS\_og (original) and LEGOS\_md (with model constant densities). Table: root mean square error (RMS) and mean difference (MD) between FREE, UNIVAR, MULTIVAR, LEGOS\_og, LEGOS\_md and CS2SMOS data, calculated on the LEGOS zone and outside the LEGOS zone and for CS2SMOS sea ice thickness of less than or greater than 1m. The table colors highlight the values close to 0 (white) and the extremes (green for the RMS, and blue/red for the negative/positive MD).

May 2017 Antarctic sea ice volume, comparison with SMOS product

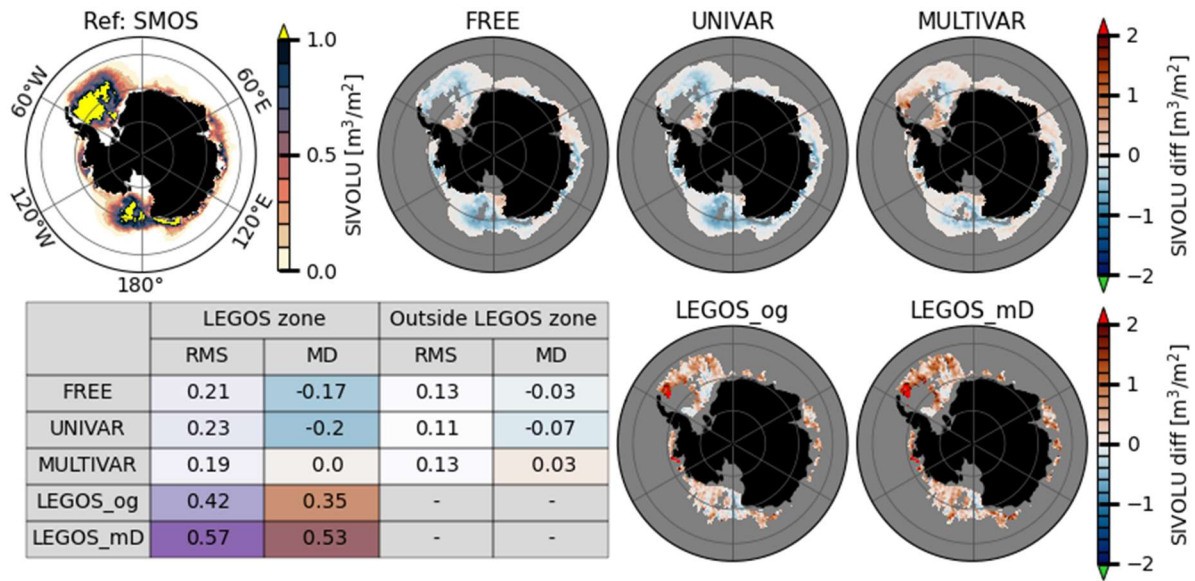

June 2017 Antarctic sea ice volume, comparison with SMOS product

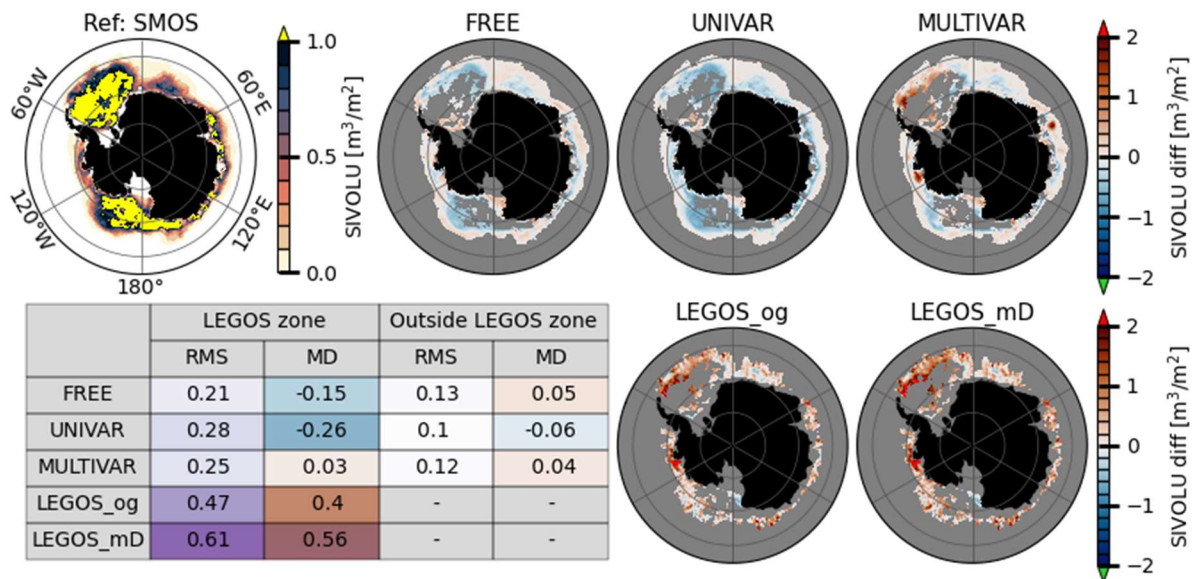



July 2017 Antarctic sea ice volume, comparison with SMOS product

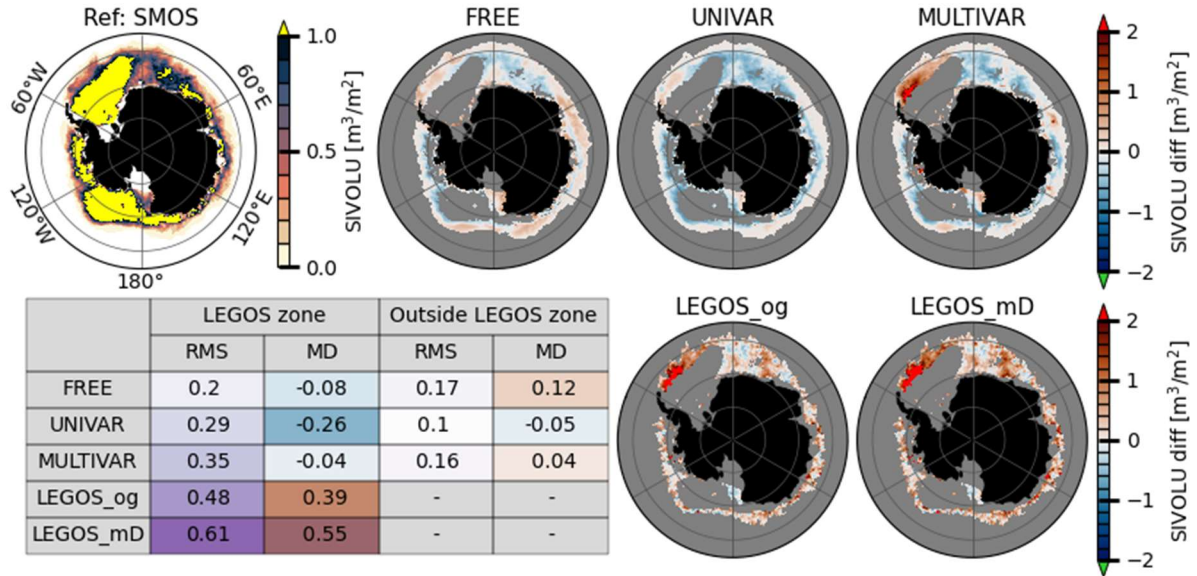

August 2017 Antarctic sea ice volume, comparison with SMOS product

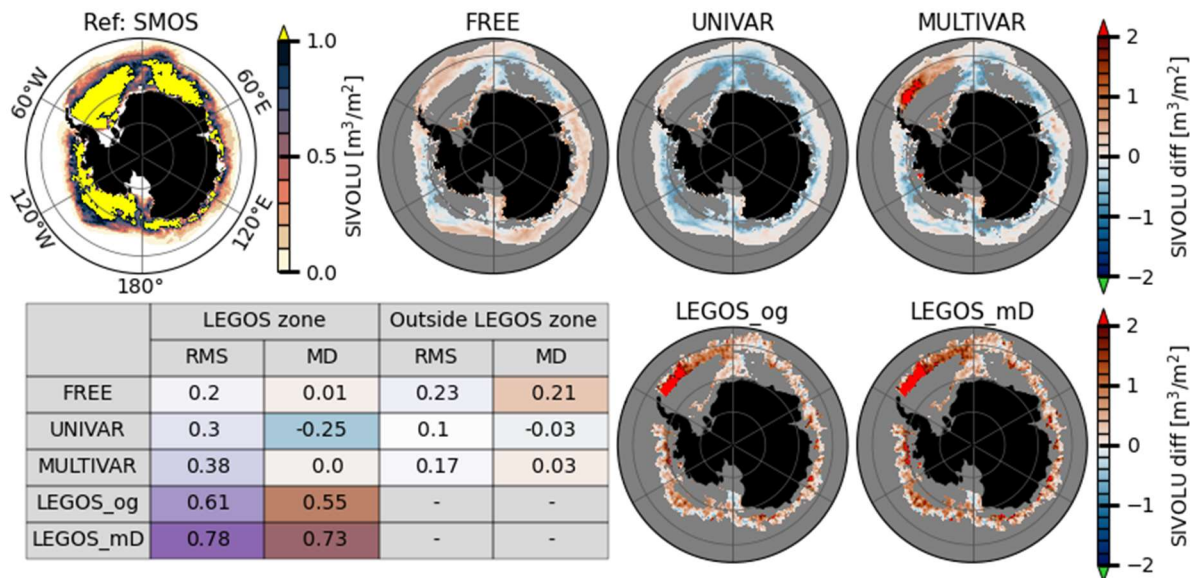

September 2017 Antarctic sea ice volume, comparison with SMOS product

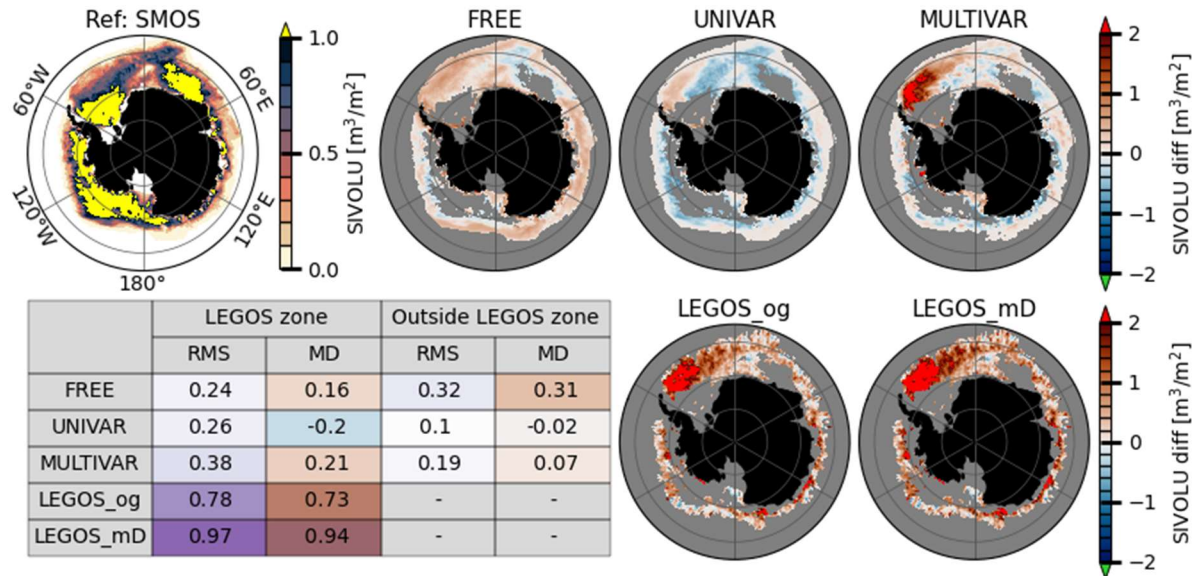

May 2018 Antarctic sea ice volume, comparison with SMOS product

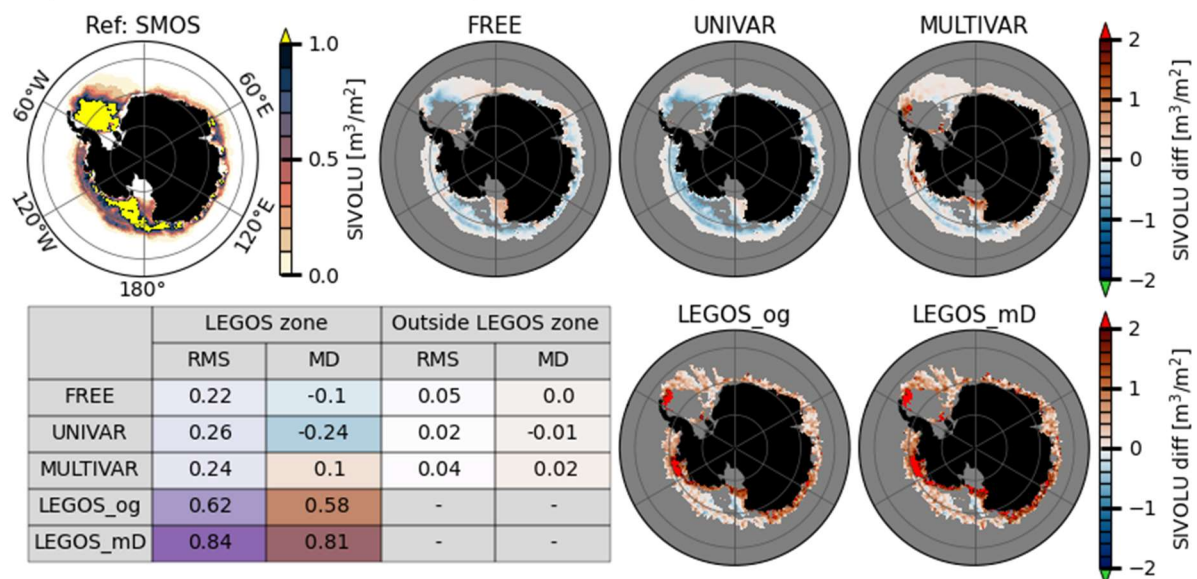

June 2018 Antarctic sea ice volume, comparison with SMOS product

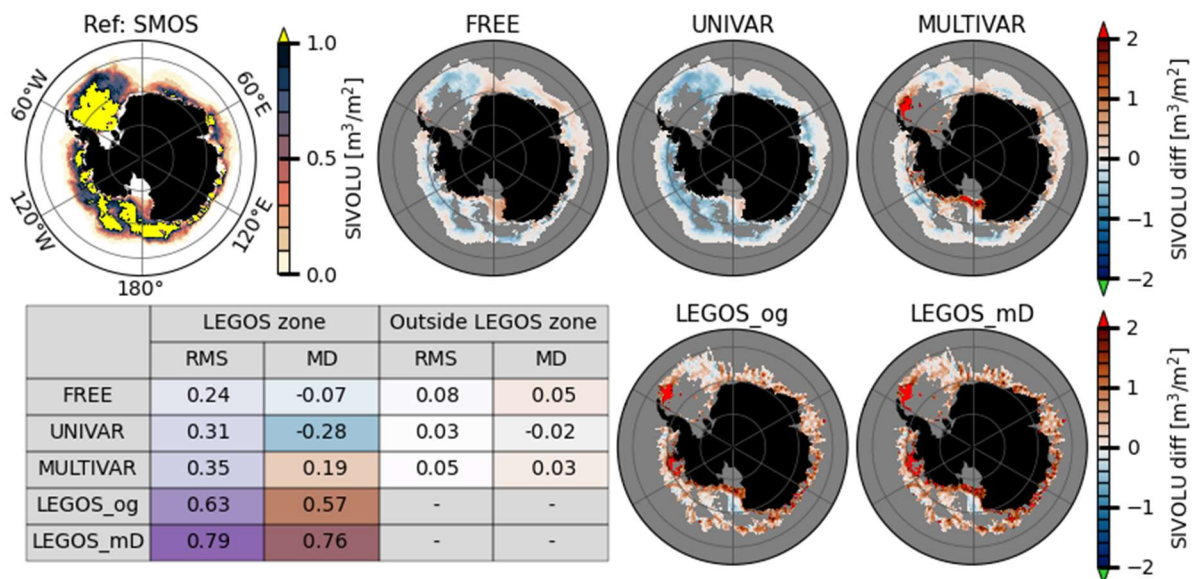

July 2018 Antarctic sea ice volume, comparison with SMOS product

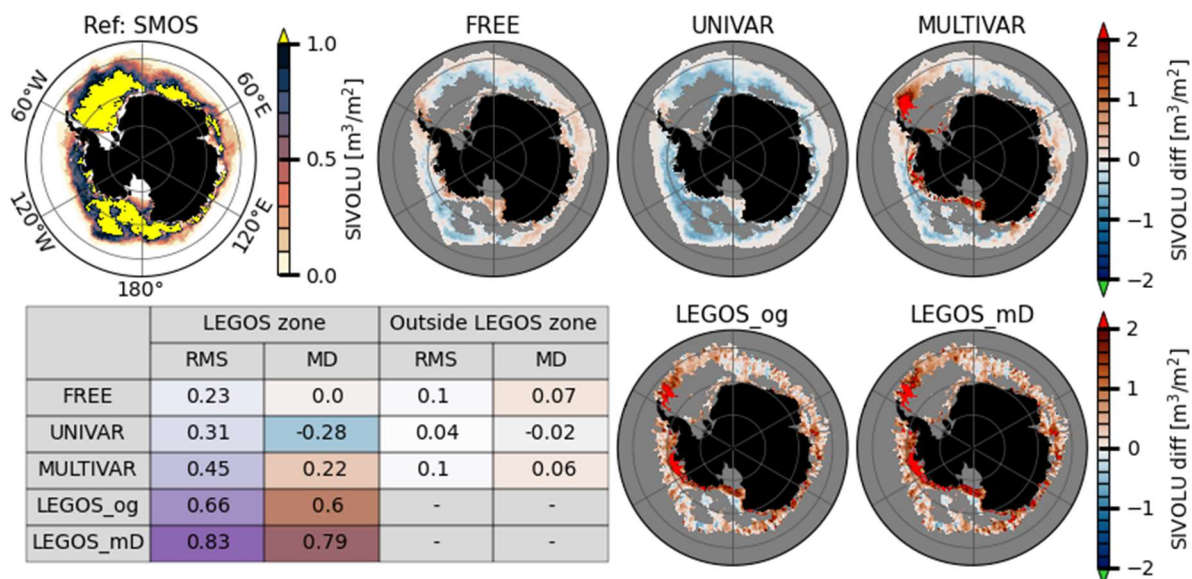



August 2018 Antarctic sea ice volume, comparison with SMOS product

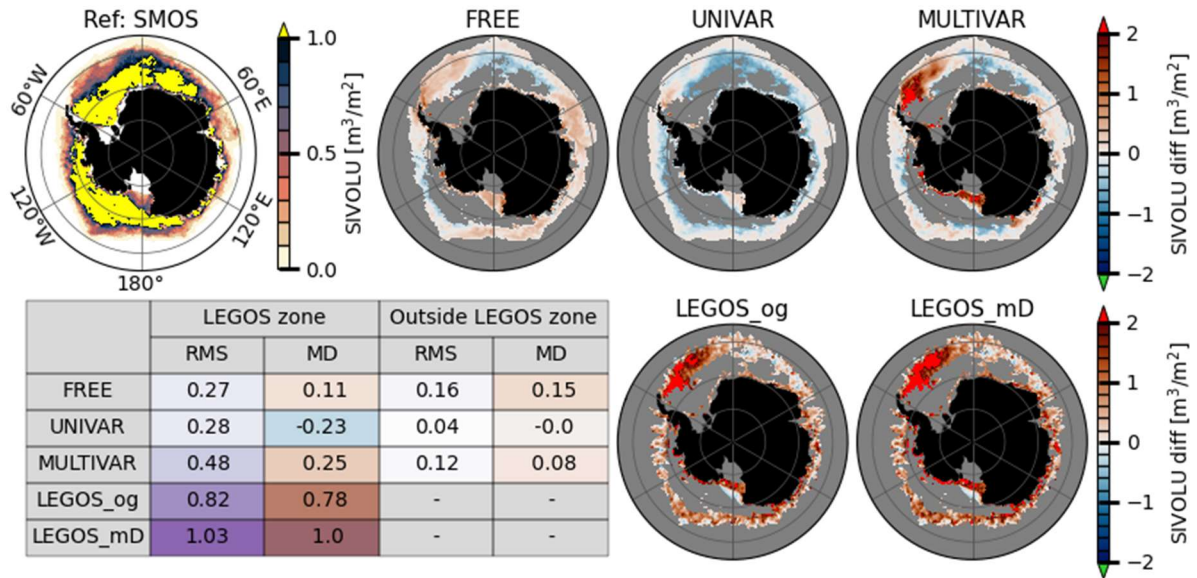

September 2018 Antarctic sea ice volume, comparison with SMOS product

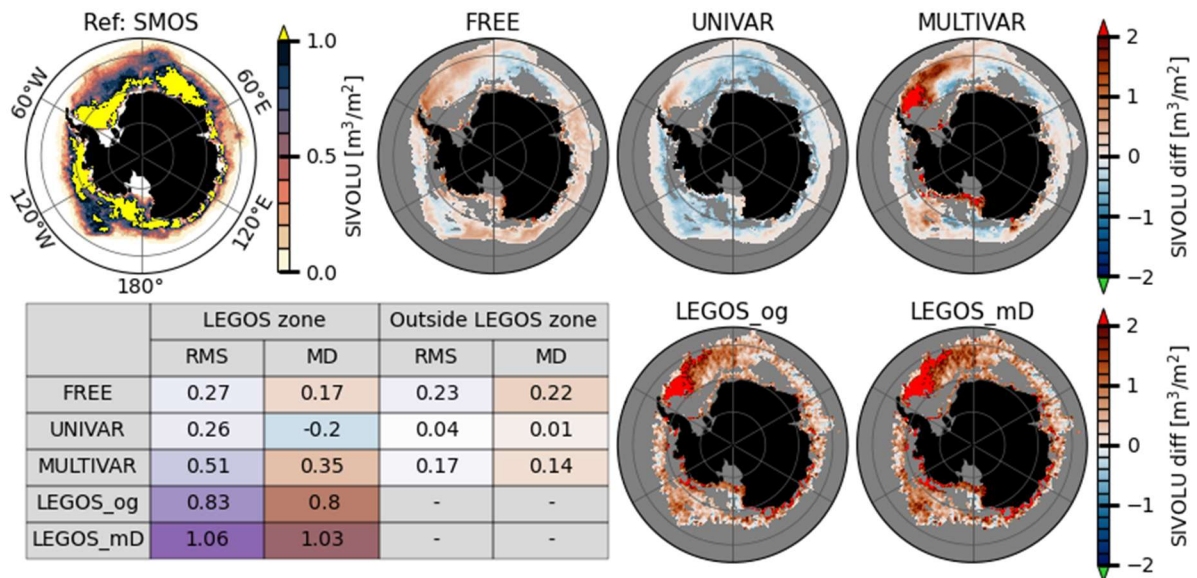

Supplement: Supplementary file [file egusphere-2024-3633-AC4-supplement.pdf]
